# Supplementary material for: Quantitative crystal structure analysis of 1,3,4-thiadiazole derivatives
Source: Royal Society of Chemistry journal article supplement (doi:10.1039/c3ce40278a), 2013-01-01
Supplement: c3ce40278a.pdf [file c3ce40278a.pdf]

# Supporting Information

## Quantitative crystal structure analysis of thiadiazoles derivatives

Piyush Panini, T. P. Mohan, Raveesh, Usma Gangwar, Deepak Chopra

### Section 1:

**Table S1. Characterization data of 2-(4''-substituted benzamido)-5-(4'-fluoro-3'-phenoxyphenyl)-1,3,4-thiadiazoles**

| Compd. No. | R                | M.P. (Onset Value from DSC plot) | Yield (%) | Nature of the Compd. | Molecular Formula                                                              | Analysis(%)        |                |                  |
|------------|------------------|----------------------------------|-----------|----------------------|--------------------------------------------------------------------------------|--------------------|----------------|------------------|
|            |                  |                                  |           |                      |                                                                                | Found (Calculated) |                |                  |
|            |                  |                                  |           |                      |                                                                                | C                  | H              | N                |
| TDZ-1      | H                | 260.59                           | 73        | white powder         | C <sub>21</sub> H <sub>14</sub> FN <sub>3</sub> O <sub>2</sub> S               | 64.44<br>(64.35)   | 3.61<br>(3.68) | 10.74<br>(10.47) |
| TDZ-2      | F                | 233.88                           | 65        | white powder         | C <sub>21</sub> H <sub>13</sub> F <sub>2</sub> N <sub>3</sub> O <sub>2</sub> S | 61.61<br>(61.47)   | 3.20<br>(3.18) | 10.26<br>(10.41) |
| TDZ-3      | CH <sub>3</sub>  | 252.78                           | 68        | white powder         | C <sub>22</sub> H <sub>16</sub> F N <sub>3</sub> O <sub>2</sub> S              | 65.17<br>(65.56)   | 3.98<br>(3.58) | 10.36<br>(10.18) |
| TDZ-4      | OCH <sub>3</sub> | 293.58                           | 80        | white powder         | C <sub>22</sub> H <sub>16</sub> FN <sub>3</sub> O <sub>3</sub> S               | 62.70<br>(62.51)   | 3.83<br>(3.89) | 9.97<br>(9.78)   |

**TDZ-1: IR** :  $\nu$  cm<sup>-1</sup>, 3214 (N-H str.), 1642(C=O str.), 1605-1500 (C=C / C=N str. ), 1215 (C-O-C str.)

**TDZ-2: IR** :  $\nu$  cm<sup>-1</sup>, 3151 (N-H str.), 1676 (C=O str.), 1593- 1498 (C=C / C=N str.), 1216 (C-O-C str.).

**TDZ-3: IR** :  $\nu$  cm<sup>-1</sup>, 3149 (N-H str.), 1666 (C=O str.), 1595-1499 (C=C / C=N str.), 1212 (C-O-C str.).

**TDZ-4: IR** :  $\nu$  cm<sup>-1</sup>, 3150 (N-H str.), 1648 (C=O str.), 1597- 1498 (C=C / C=N str.) 1212 (C-O-C str.).

**Table S2: Crystallization Experiments:**

| Compound Code | Solvents                                                                                       | Result                                    |
|---------------|------------------------------------------------------------------------------------------------|-------------------------------------------|
| TDZ-1         | (a ) <b>Toluene*</b> (b) Ethanol                                                               | Crystals obtained and same Form observed. |
| TDZ-2         | (a) <b>Ethanol + Hexane*</b> (b) DCM + Hexane (c) THF +Hexane                                  | Crystals obtained and same Form observed. |
| TDZ-3         | (a) <b>DCM + hexane*</b> (b) Chloroform +hexane (c) Ethanol + Hexane (d) Acetonitrile + Hexane | Crystals obtained and same Form observed. |
| TDZ-4         | (a) <b>DCM + hexane*</b> (b) Acetone + Hexane                                                  | Crystals obtained and same Form observed. |

\*: indicates the solvent system from which the obtained crystals were used for single crystal XRD.

**Figure S1: <sup>1</sup>H NMR of all compounds:** All NMR experiments were recorded on 400MHz spectrometer (from Bruker) in CDCl<sub>3</sub> as solvent.

(a) **TDZ-1:** <sup>1</sup>H NMR (400 MHz, CDCl<sub>3</sub>): δ 8.12 (d, J = 7.90 Hz, 2H), 7.79-7.71 (m, 1H), 7.70-7.66 (m, 1H), 7.65-7.62 (m, 1H), 7.59-7.55 (m, 1H), 7.52-7.47 (m, 2H), 7.39-7.35 (m, 2H), 7.33-7.29 (m, 1H), 7.16 (t, J = 7.20Hz, 1H), 7.06 (d, J = 8.10Hz, 2H)

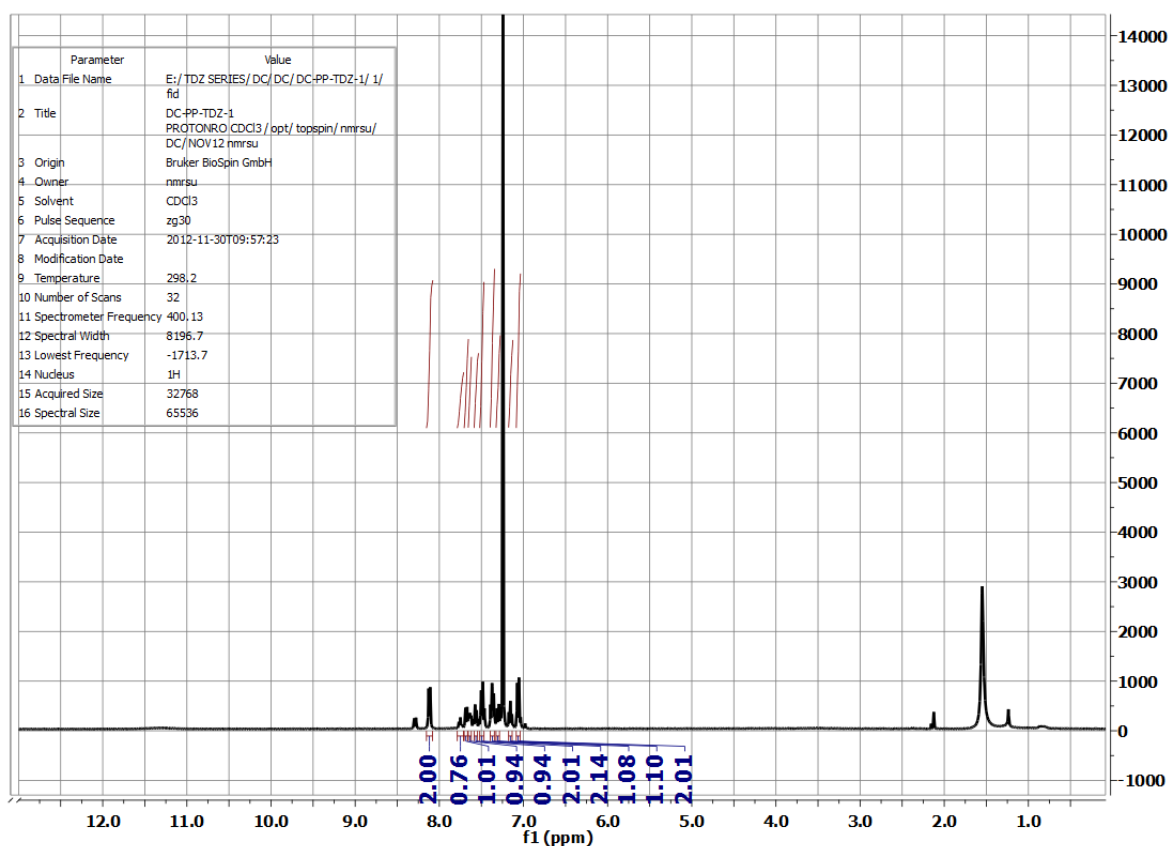

(b) **TDZ-2:**  $^1\text{H}$  NMR (400 MHz,  $\text{CDCl}_3$ ):  $\delta$  8.30-8.24 (m, 2H), 7.65-7.59 (m, 2H), 7.37 (t,  $J = 8.02\text{Hz}$ , 2H), 7.31 (t,  $J = 9.30\text{Hz}$ , 1H), 7.14 (t,  $J = 8.41\text{Hz}$ , 3H), 7.07 (d,  $J = 8.08\text{Hz}$ , 2H).

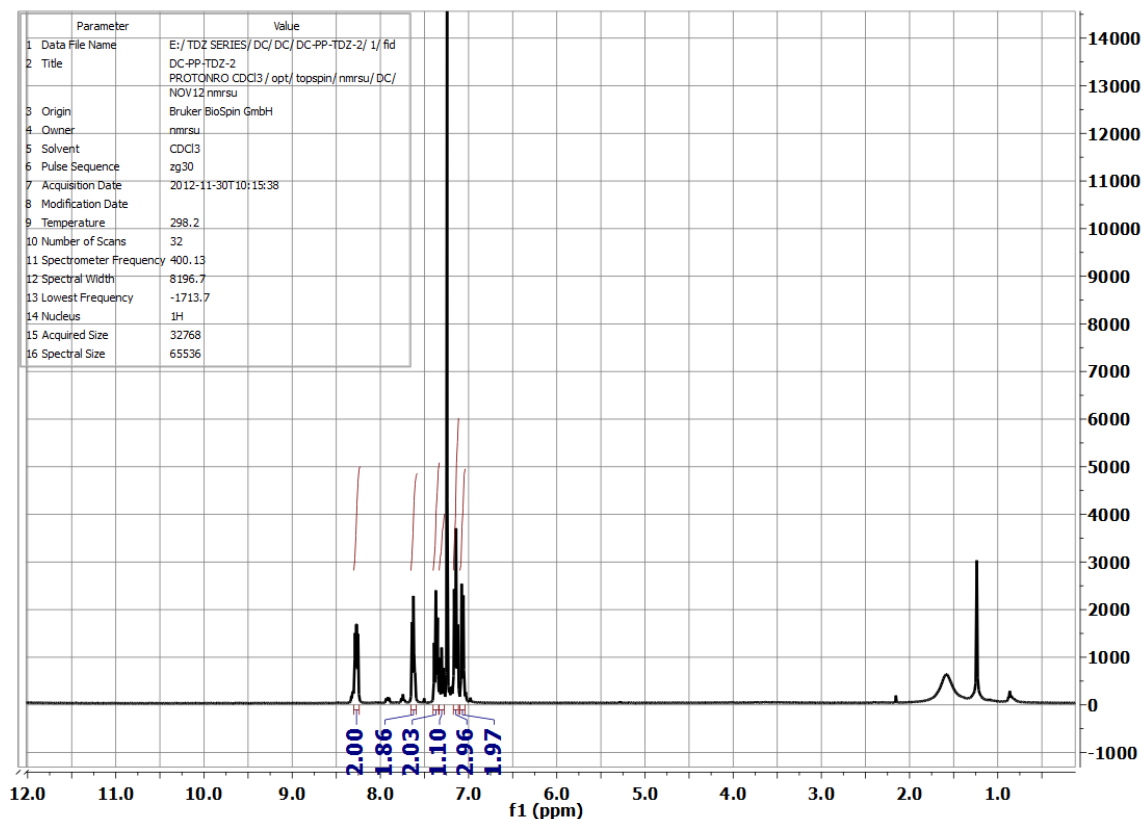

(c) **TDZ-3:**  $^1\text{H}$  NMR (400 MHz,  $\text{CDCl}_3$ ):  $\delta$  8.04 (d,  $J = 8.19\text{Hz}$ , 2H), 7.72-7.63 (m, 2H), 7.35 (t,  $J = 8.03\text{Hz}$ , 2H), 7.30 (d,  $J = 8.51\text{Hz}$ , 3H), 7.13 (t,  $J = 7.43\text{Hz}$ , 1H), 7.04 (d,  $J = 7.85\text{Hz}$ , 2H), 2.40 (s, 3H).

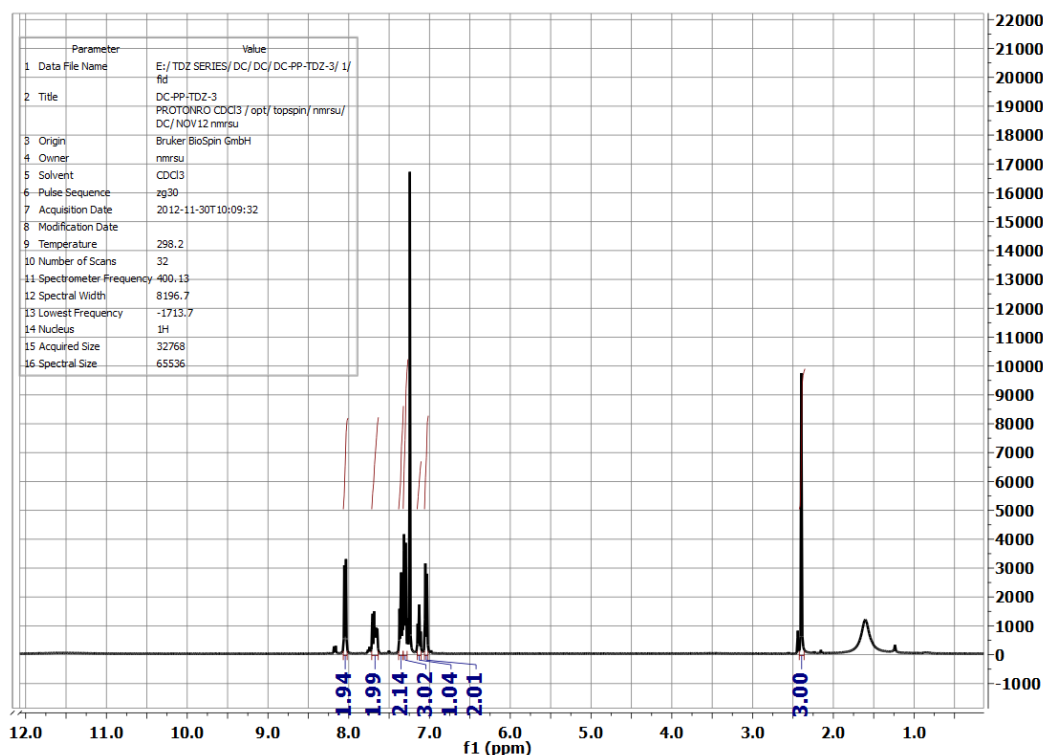

(d) **TDZ-4**:  $^1\text{H}$  NMR (400 MHz,  $\text{CDCl}_3$ ):  $\delta$  8.25 (d,  $J = 8.89\text{Hz}$ , 2H), 7.77-7.71 (m, 2H), 7.39-7.32 (m, 3H), 7.15 (d,  $J = 7.39\text{Hz}$ , 1H), 7.04 (d,  $J = 7.94\text{Hz}$ , 3H), 7.00-6.96 (m, 2H), 3.90 (s, 3H).

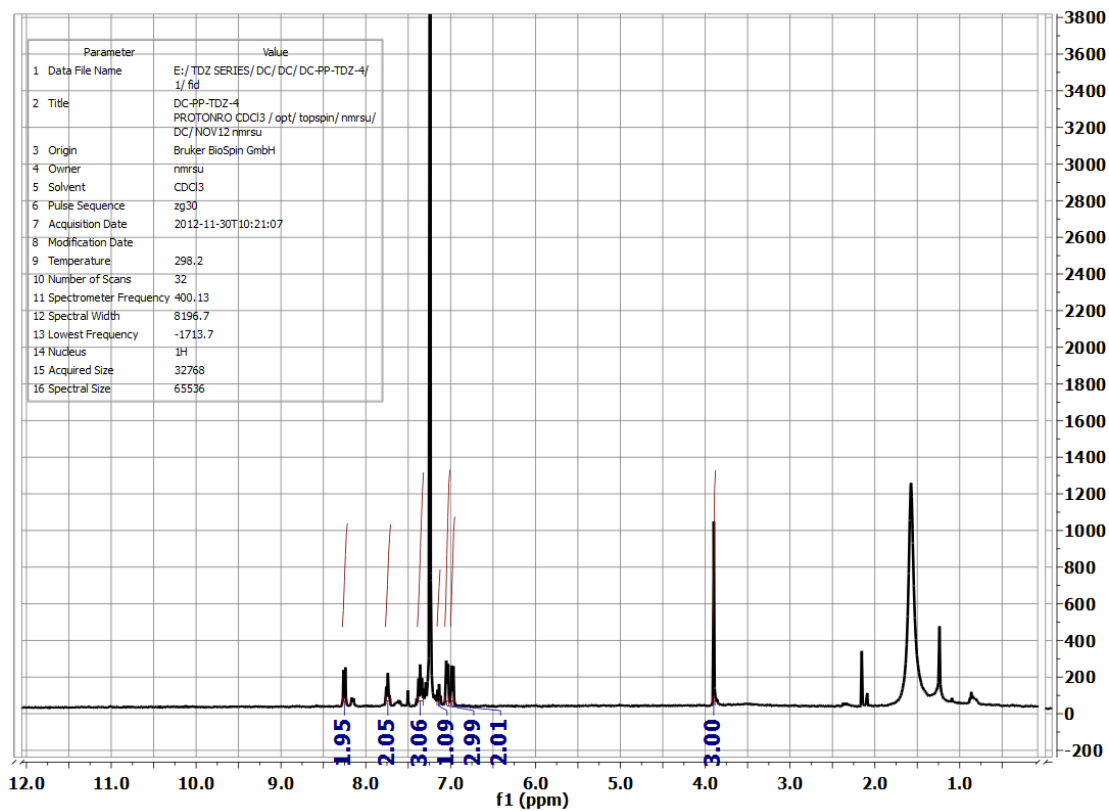

Figure S2: Mass spectra of all compounds:

(a) TDZ-1: HRMS-ESI<sup>+</sup> : 392.0889 (calculated for C<sub>21</sub>H<sub>14</sub>FN<sub>3</sub>O<sub>2</sub>S + H<sup>+</sup>: 392.0864)

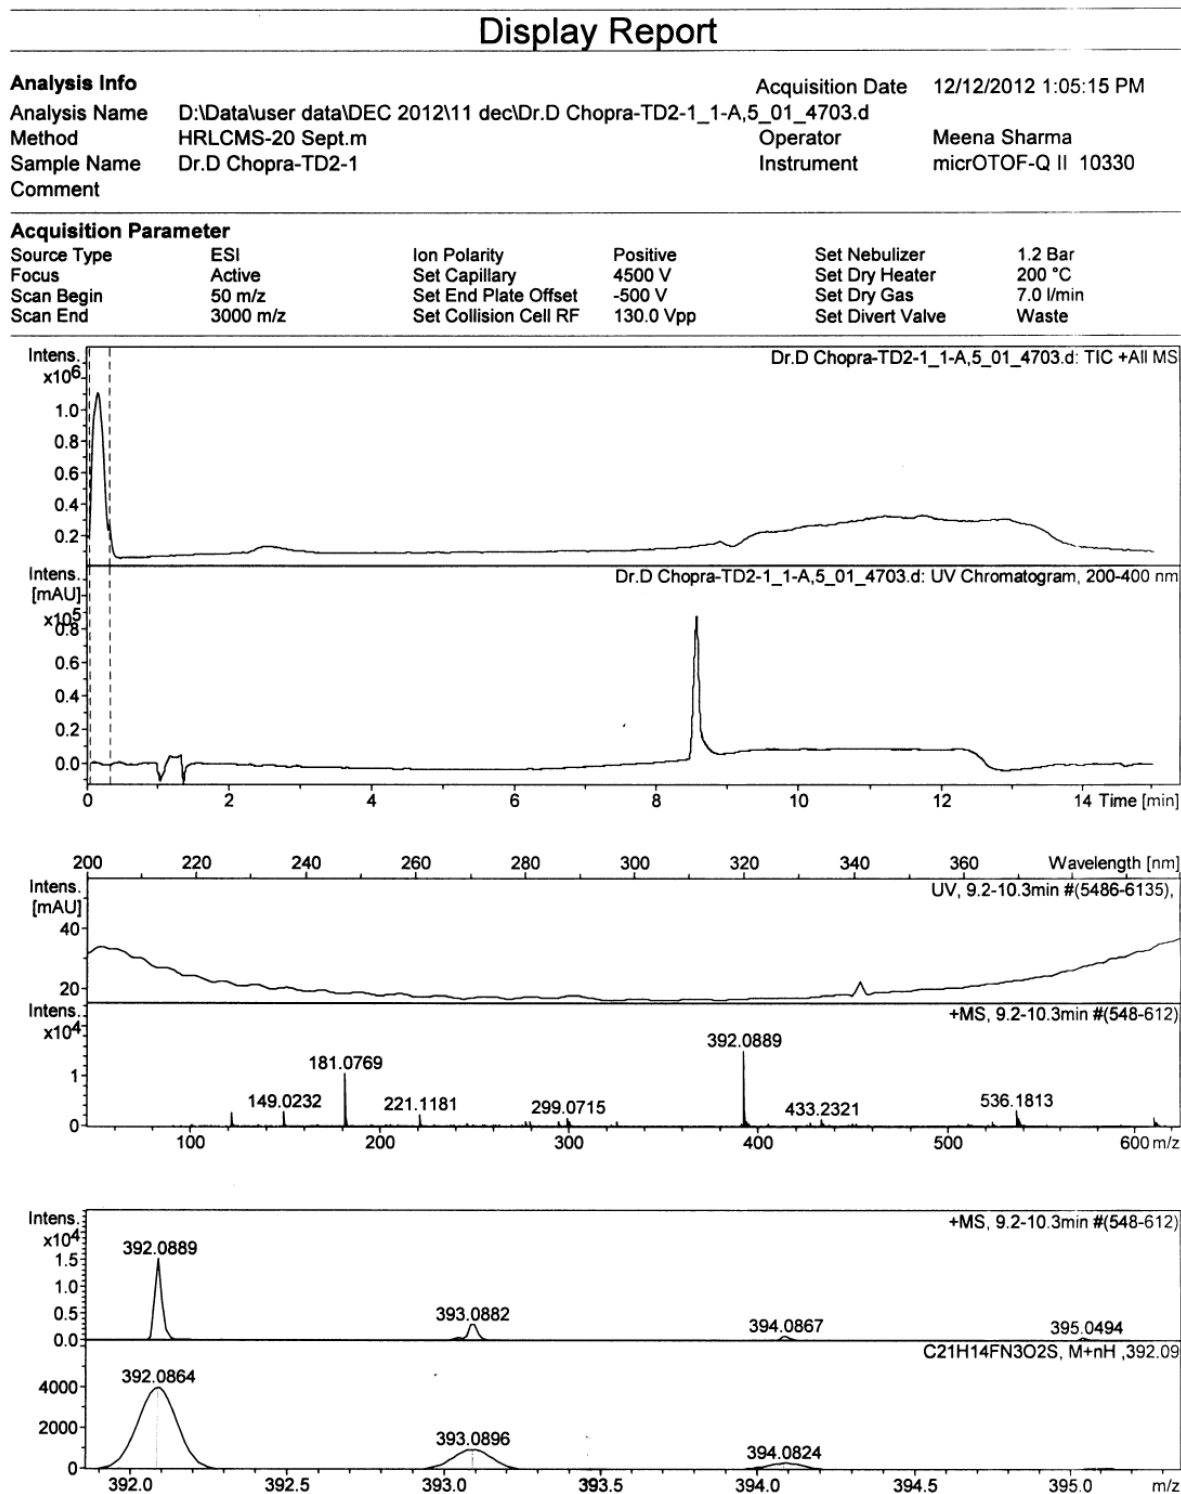

(b) **TDZ-2**: HRMS-ESI<sup>+</sup> : 410.0774 (calculated for C<sub>21</sub>H<sub>13</sub>F<sub>2</sub>N<sub>3</sub>O<sub>2</sub>S + H<sup>+</sup>: 410.0769)

### Display Report

#### Analysis Info

|               |                                                                    |                  |                      |
|---------------|--------------------------------------------------------------------|------------------|----------------------|
| Analysis Name | D:\Data\user data\2013\FEB\07 FEB\Dr.D.Chopra-TD2-2_1-B,1_01_145.d | Acquisition Date | 2/7/2013 11:01:48 AM |
| Method        | HRLCMS-20 Sept.m                                                   | Operator         | Amit                 |
| Sample Name   | Dr.D.Chopra-TD2-2                                                  | Instrument       | micrOTOF-Q II 10330  |
| Comment       |                                                                    |                  |                      |

#### Acquisition Parameter

|             |          |                       |           |                  |           |
|-------------|----------|-----------------------|-----------|------------------|-----------|
| Source Type | ESI      | Ion Polarity          | Positive  | Set Nebulizer    | 1.2 Bar   |
| Focus       | Active   | Set Capillary         | 4500 V    | Set Dry Heater   | 200 °C    |
| Scan Begin  | 50 m/z   | Set End Plate Offset  | -500 V    | Set Dry Gas      | 7.0 l/min |
| Scan End    | 3000 m/z | Set Collision Cell RF | 130.0 Vpp | Set Divert Valve | Waste     |

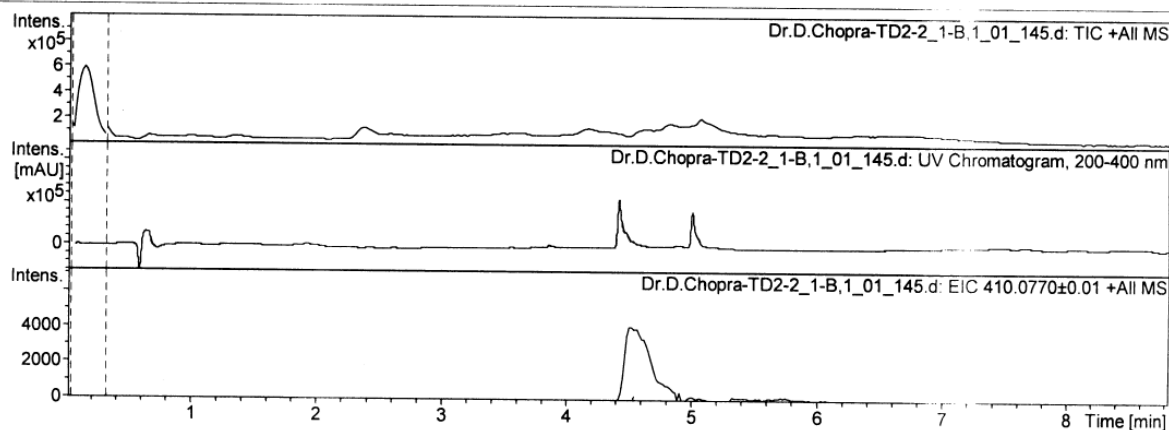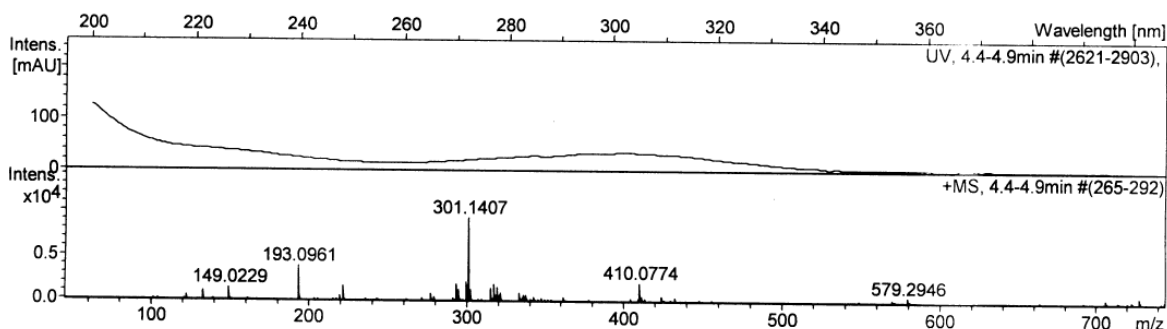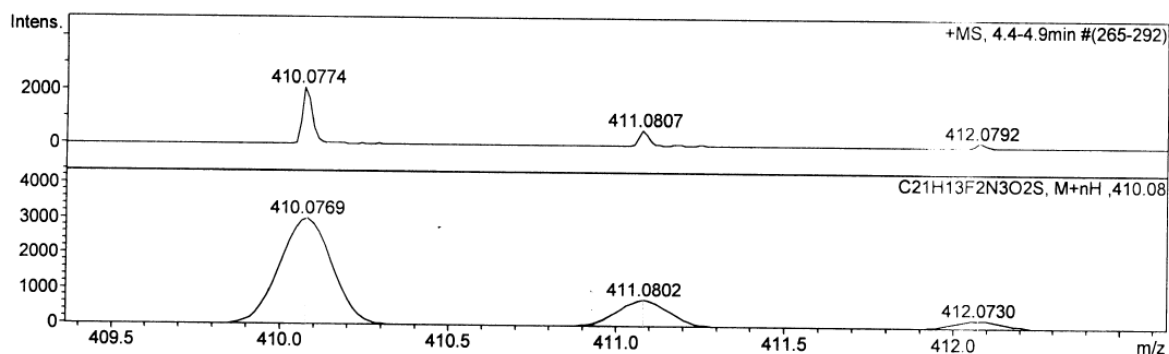

(c) **TDZ-3: HRMS-ESI<sup>+</sup> : 406.1030** (calculated for C<sub>22</sub>H<sub>16</sub>FN<sub>3</sub>O<sub>2</sub>S + H<sup>+</sup>: 406.1020)

## Display Report

### Analysis Info

|               |                                                                    |                  |                      |
|---------------|--------------------------------------------------------------------|------------------|----------------------|
| Analysis Name | D:\Data\user data\2013\FEB\07 FEB\Dr.D.Chopra-TD2-3_1-B,2_01_146.d | Acquisition Date | 2/7/2013 11:11:56 AM |
| Method        | HRLCMS-20 Sept.m                                                   | Operator         | Amit                 |
| Sample Name   | Dr.D.Chopra-TD2-3                                                  | Instrument       | micrOTOF-Q II 10330  |
| Comment       |                                                                    |                  |                      |

### Acquisition Parameter

|             |          |                       |           |                  |           |
|-------------|----------|-----------------------|-----------|------------------|-----------|
| Source Type | ESI      | Ion Polarity          | Positive  | Set Nebulizer    | 1.2 Bar   |
| Focus       | Active   | Set Capillary         | 4500 V    | Set Dry Heater   | 200 °C    |
| Scan Begin  | 50 m/z   | Set End Plate Offset  | -500 V    | Set Dry Gas      | 7.0 l/min |
| Scan End    | 3000 m/z | Set Collision Cell RF | 130.0 Vpp | Set Divert Valve | Waste     |

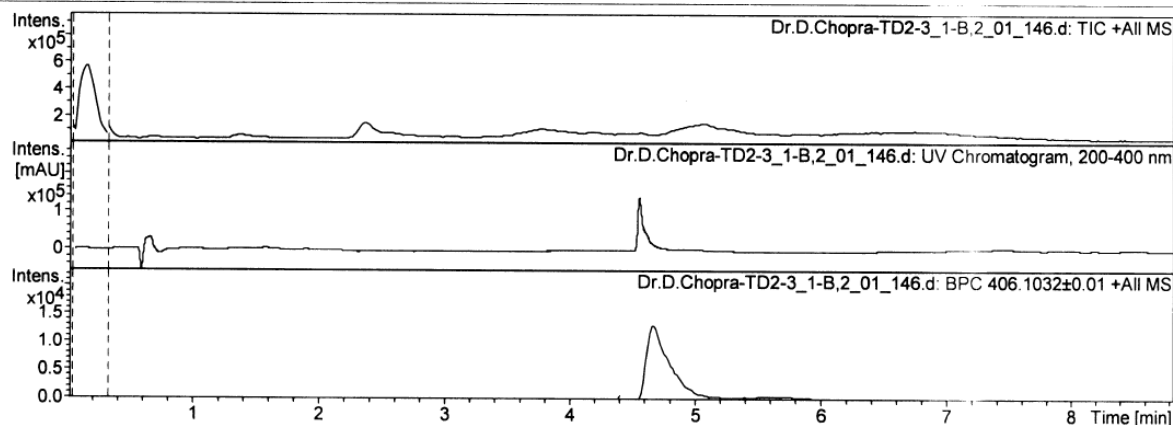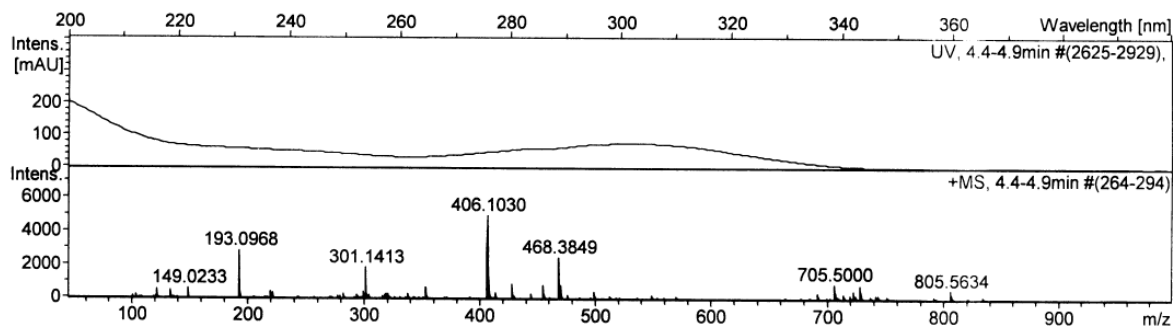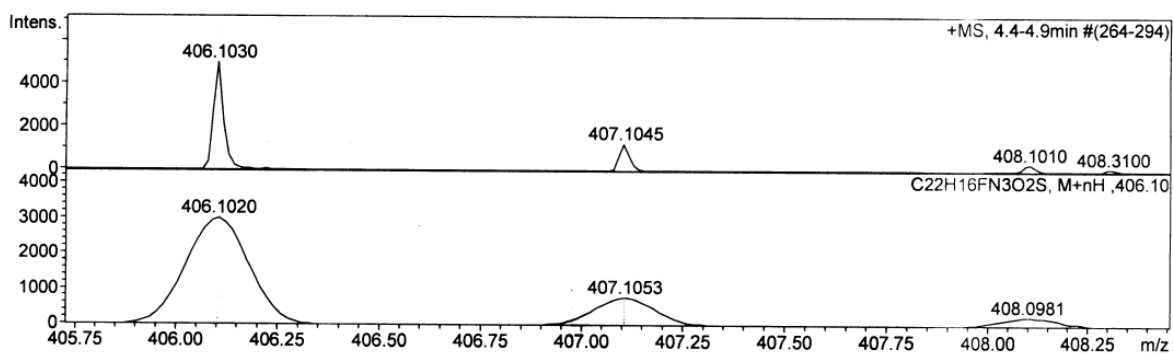

(d) **TDZ-4**: HRMS-ESI<sup>+</sup> : 422.1010 (calculated for C<sub>22</sub>H<sub>16</sub>FN<sub>3</sub>O<sub>3</sub>S + H<sup>+</sup>: 422.0969)

## Display Report

### Analysis Info

|               |                                                                     |                  |                       |
|---------------|---------------------------------------------------------------------|------------------|-----------------------|
| Analysis Name | D:\Data\user data\DEC 2012\11 dec\Dr.D Chopra-TD2-4_1-A,7_01_4705.d | Acquisition Date | 12/12/2012 1:44:12 PM |
| Method        | HRLCMS-20 Sept.m                                                    | Operator         | Meena Sharma          |
| Sample Name   | Dr.D Chopra-TD2-4                                                   | Instrument       | micrOTOF-Q II 10330   |
| Comment       |                                                                     |                  |                       |

### Acquisition Parameter

|             |          |                       |           |                  |           |
|-------------|----------|-----------------------|-----------|------------------|-----------|
| Source Type | ESI      | Ion Polarity          | Positive  | Set Nebulizer    | 1.2 Bar   |
| Focus       | Active   | Set Capillary         | 4500 V    | Set Dry Heater   | 200 °C    |
| Scan Begin  | 50 m/z   | Set End Plate Offset  | -500 V    | Set Dry Gas      | 7.0 l/min |
| Scan End    | 3000 m/z | Set Collision Cell RF | 130.0 Vpp | Set Divert Valve | Waste     |

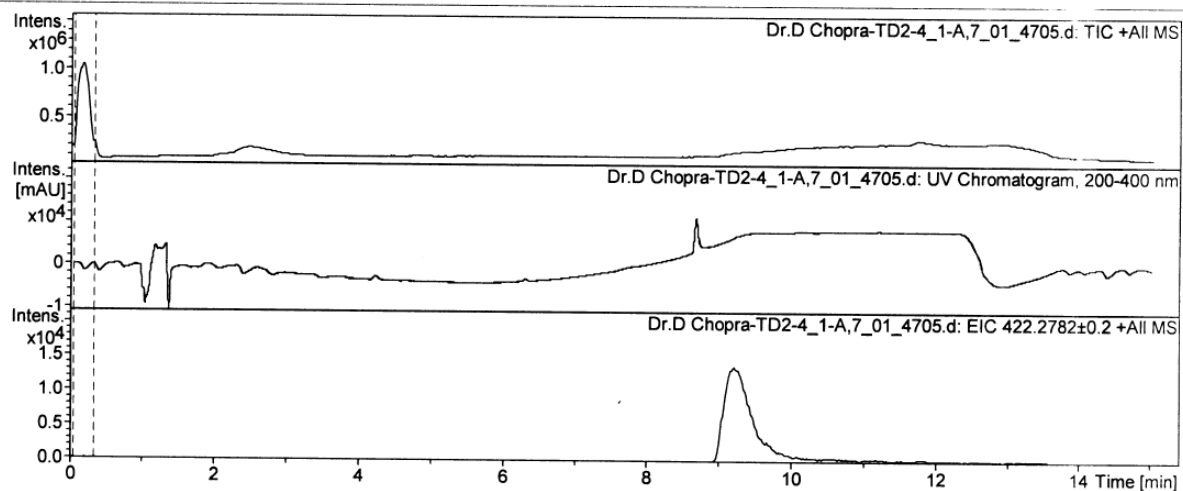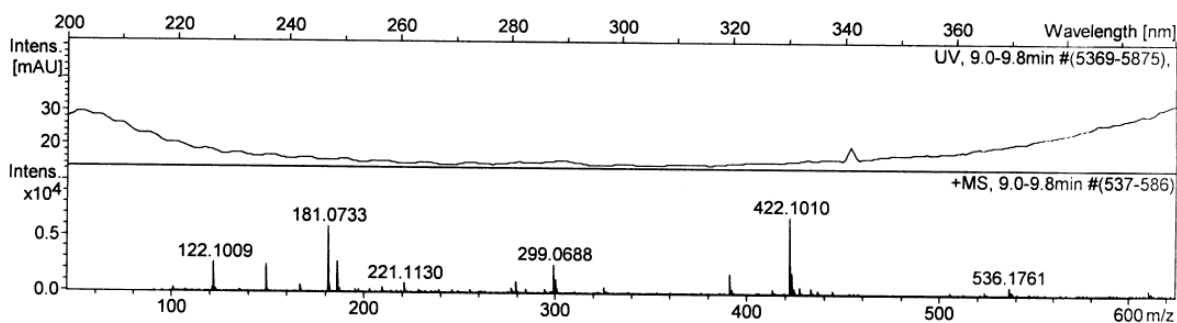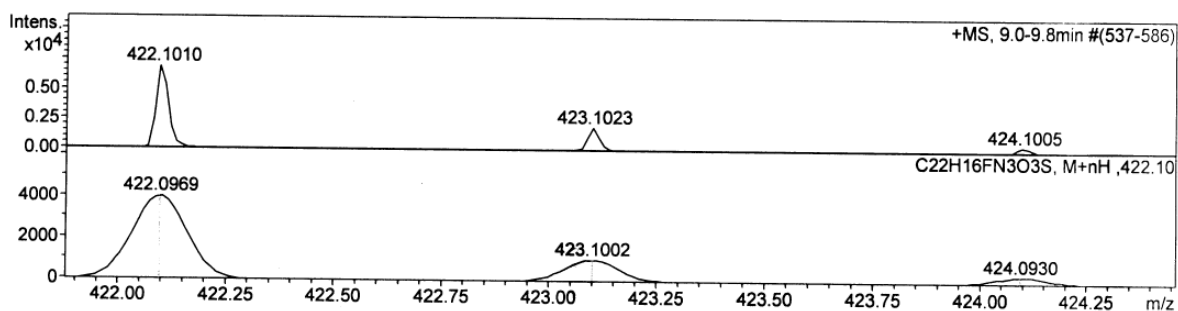



**Figure S3: DSC curves of solids (@ 5°C/min) recorded on Perkin Elmer DSC 6000.**

**(a) TDZ-1:**

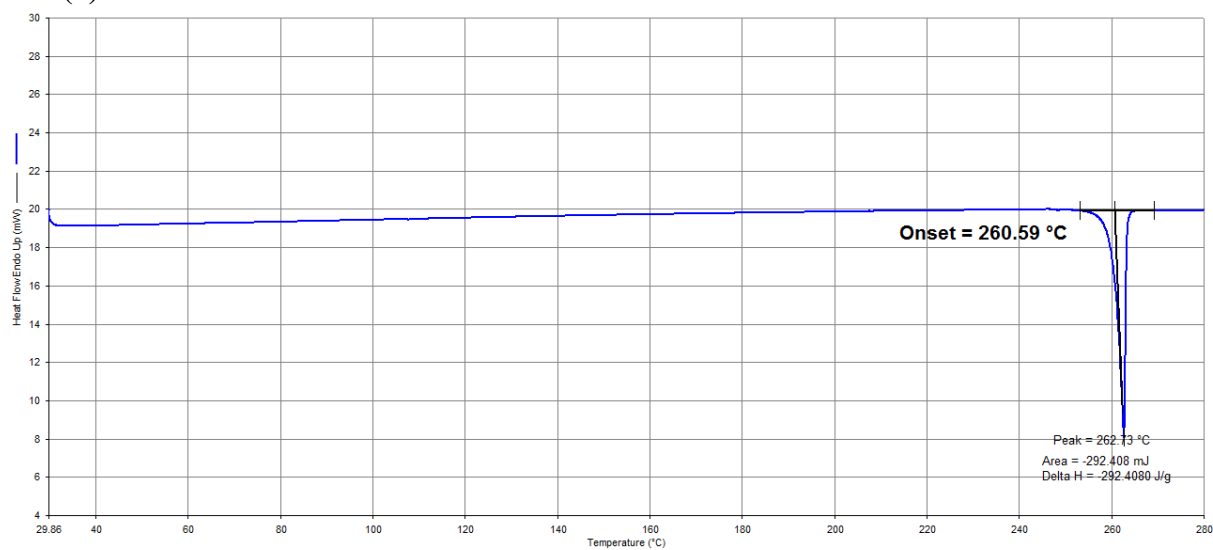

**(b) TDZ-2:**

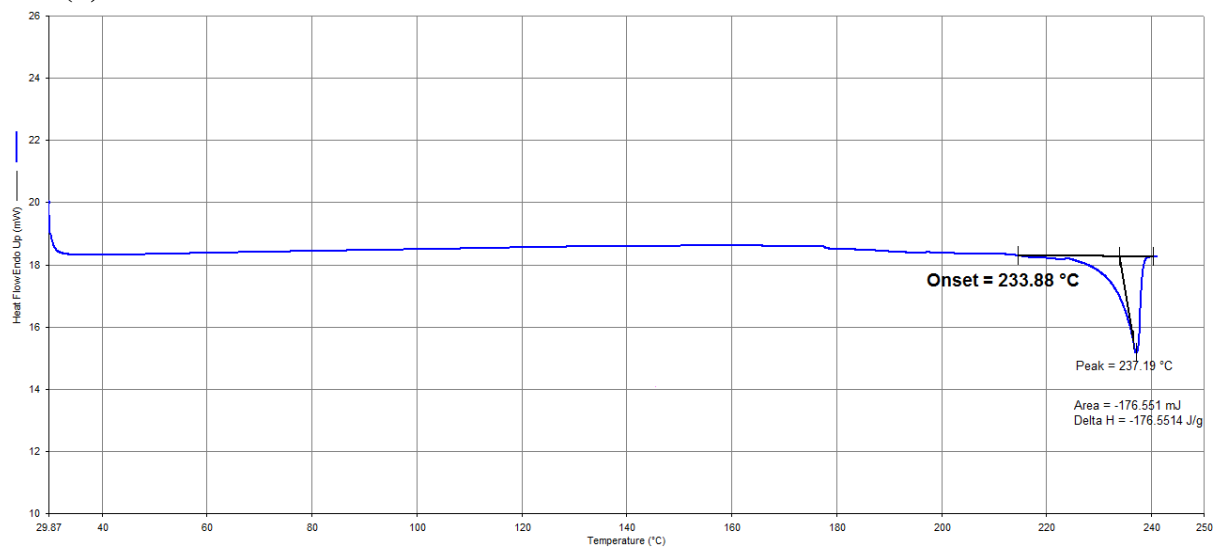

**(c) TDZ-3:**

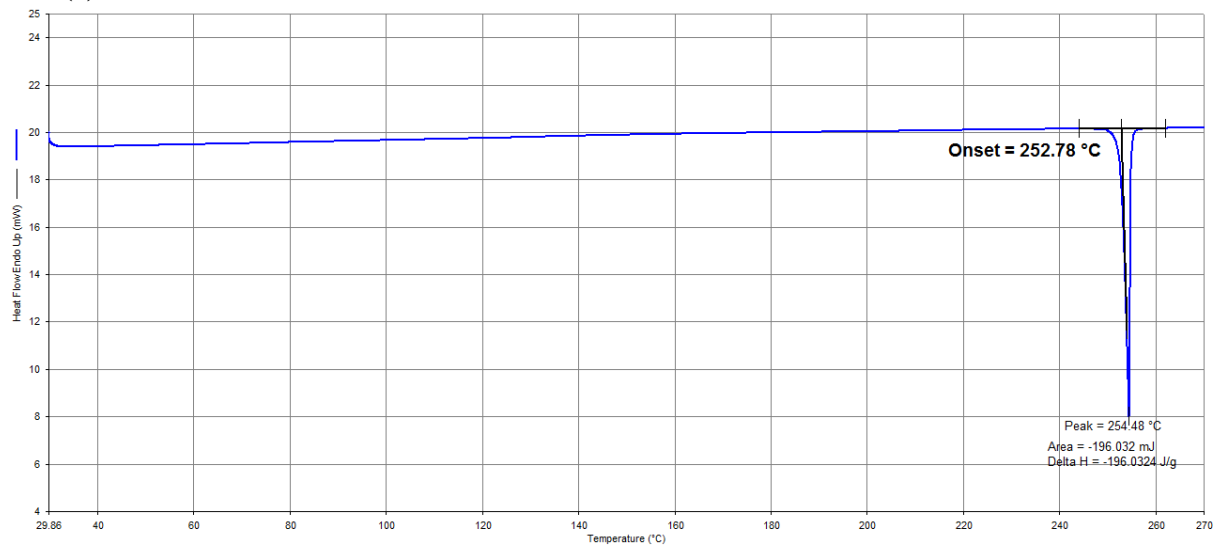

**(d) TDZ-4:**

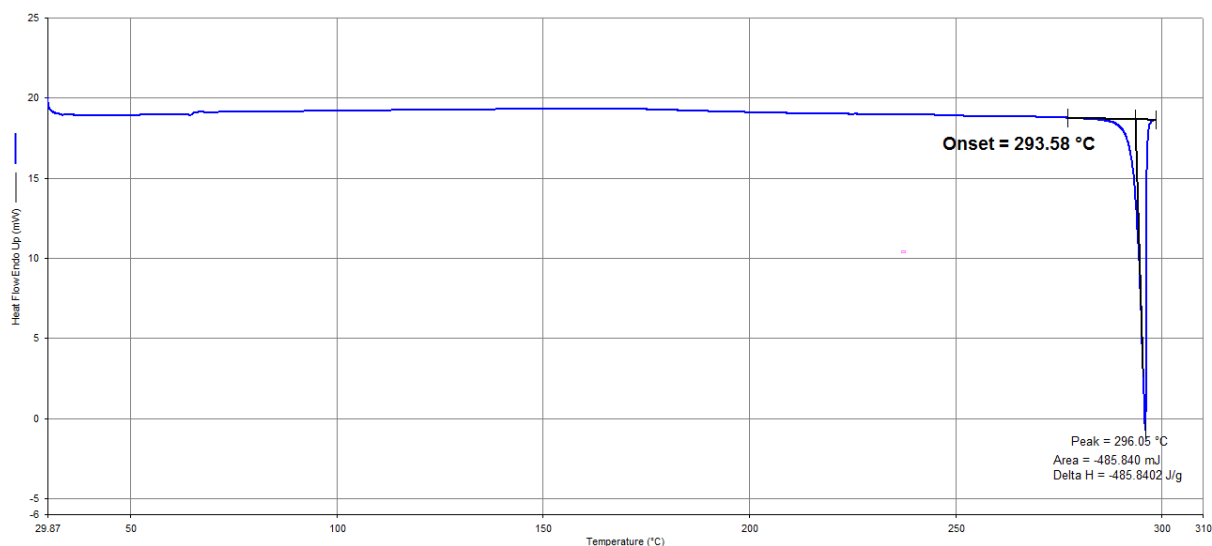

**Figure S4:** Comparison of Simulated powder pattern with experimental powder pattern recorded on PANalytical Empyrean (between 5 - 50° in 2 $\theta$ ): Profile fitting Refinement was performed with JANA 2000. Profile fitting parameter  $R_p$  and  $R_{wp}$  are given the diagrams. The higher values of  $R_p$  and  $R_{wp}$  in case of **TDZ-1** may indicate the presence of more than one phase in the bulk powder.

**(a) TDZ-1:**

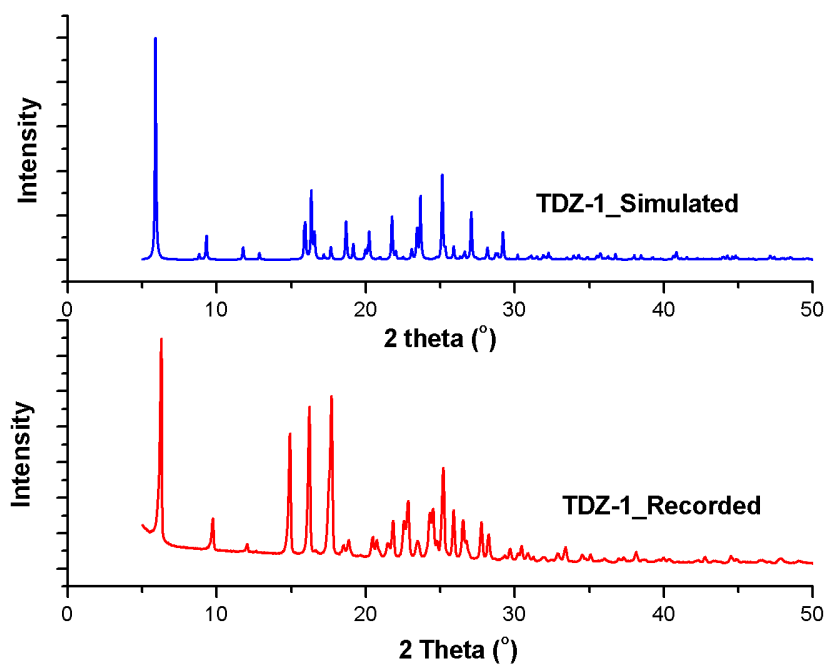

Powder profile based on prf file TDZ-1

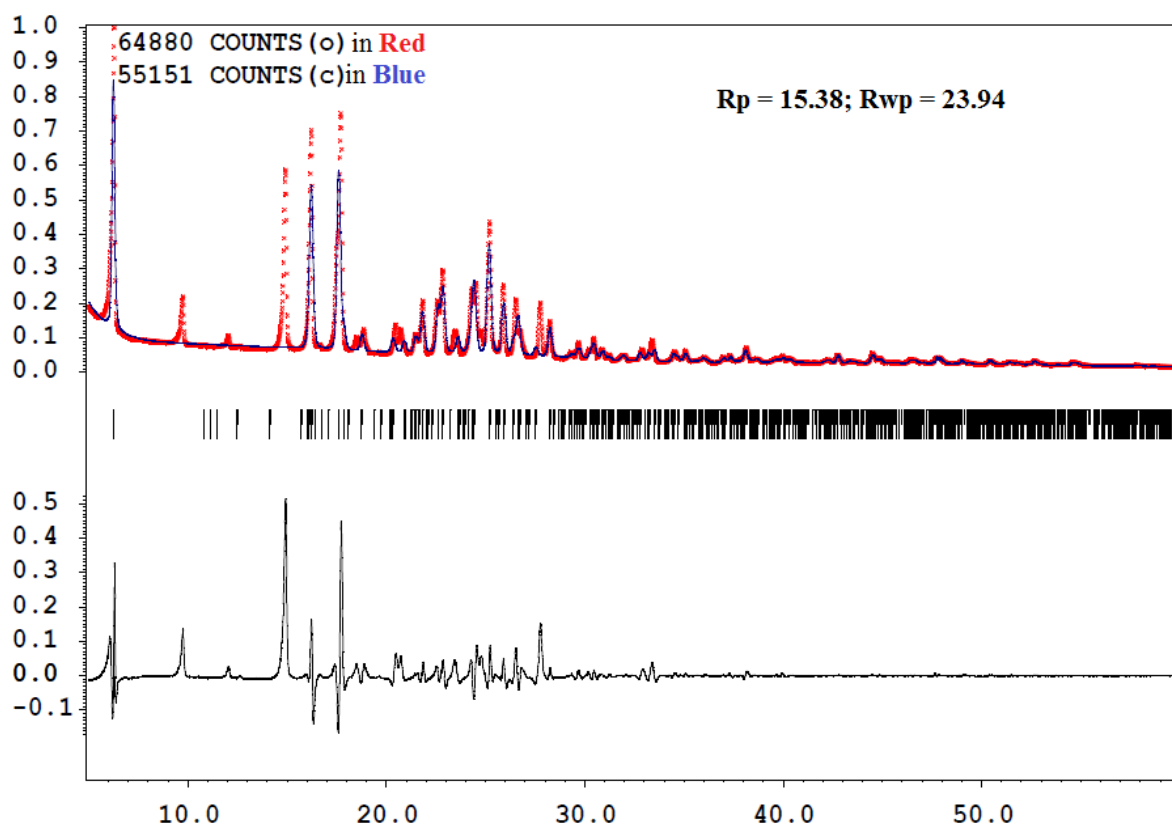

(b) TDZ-2:

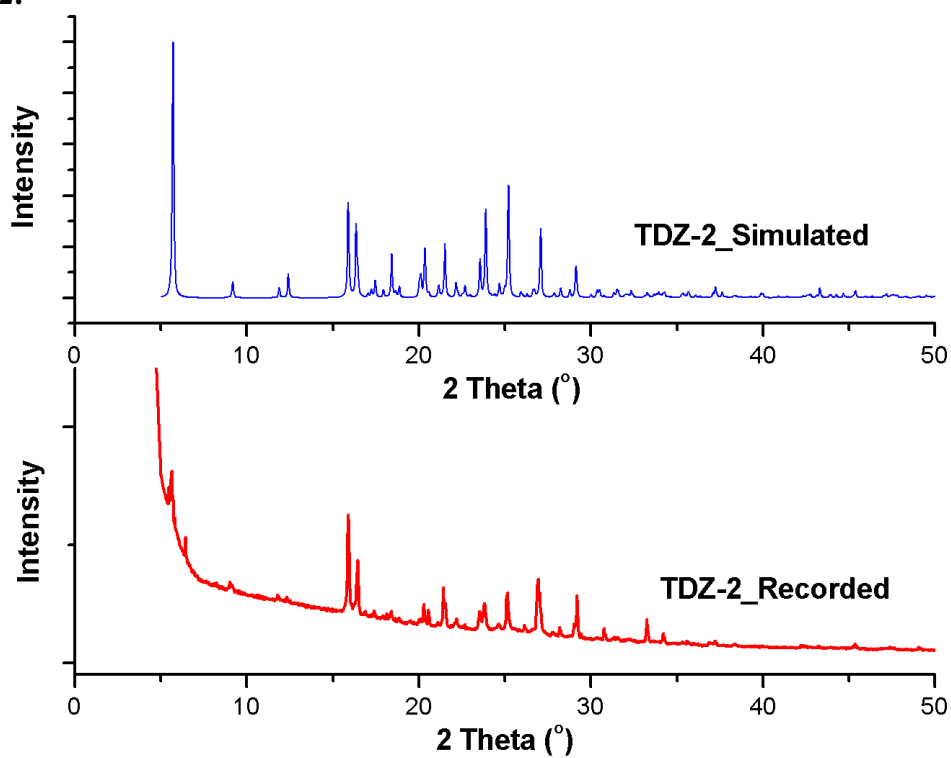

Powder profile based on prf file TDZ-2

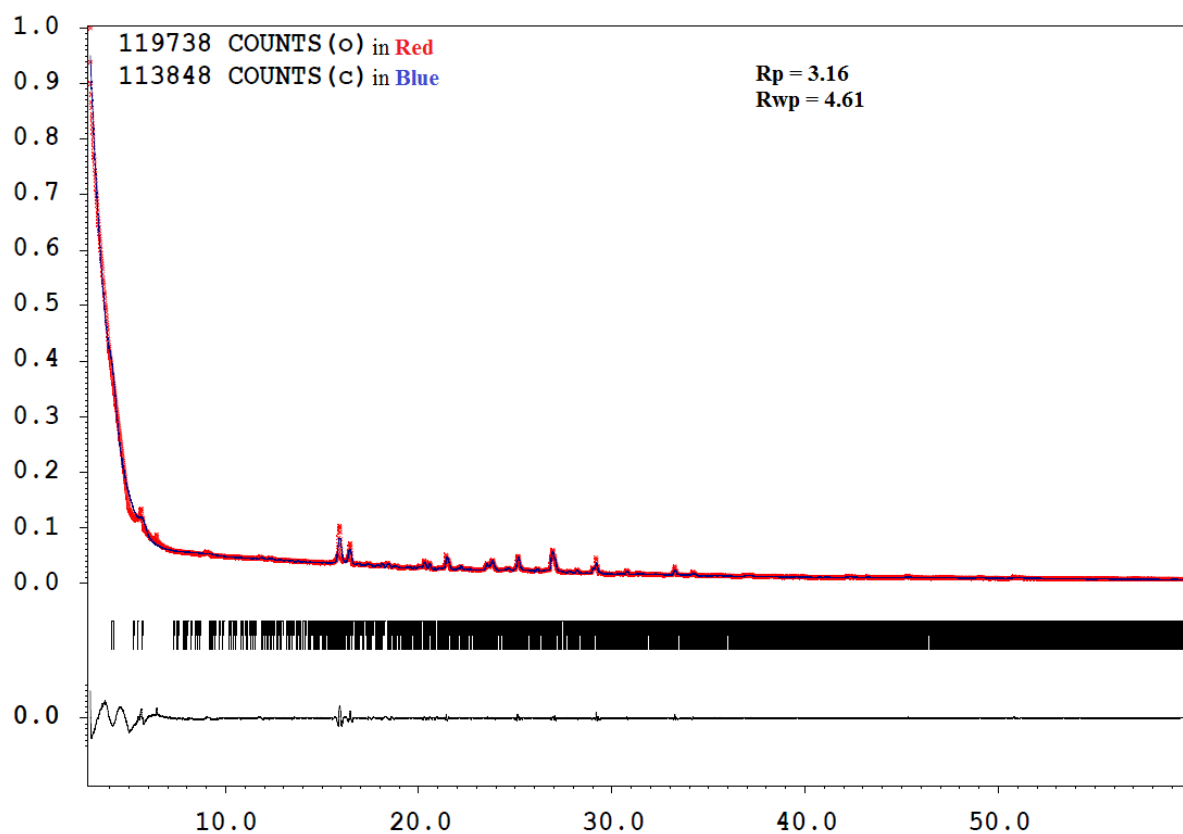

(c) TDZ-3:

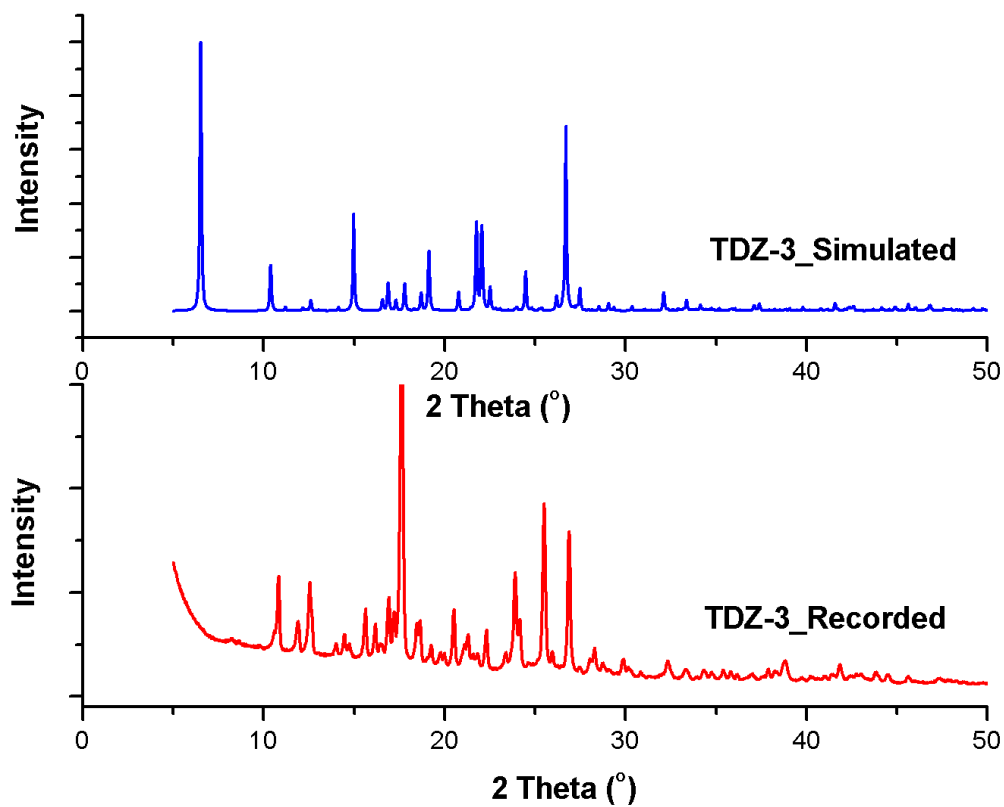

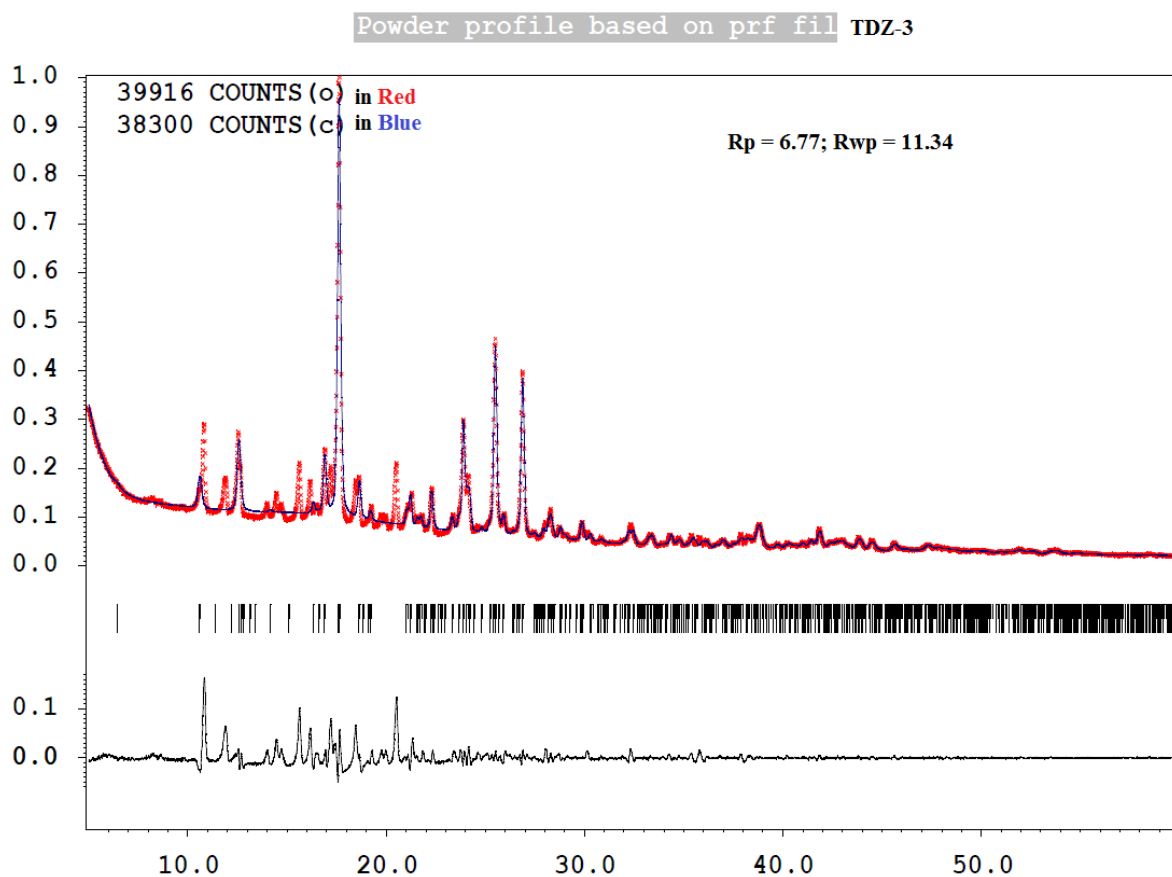

d) TDZ-4:

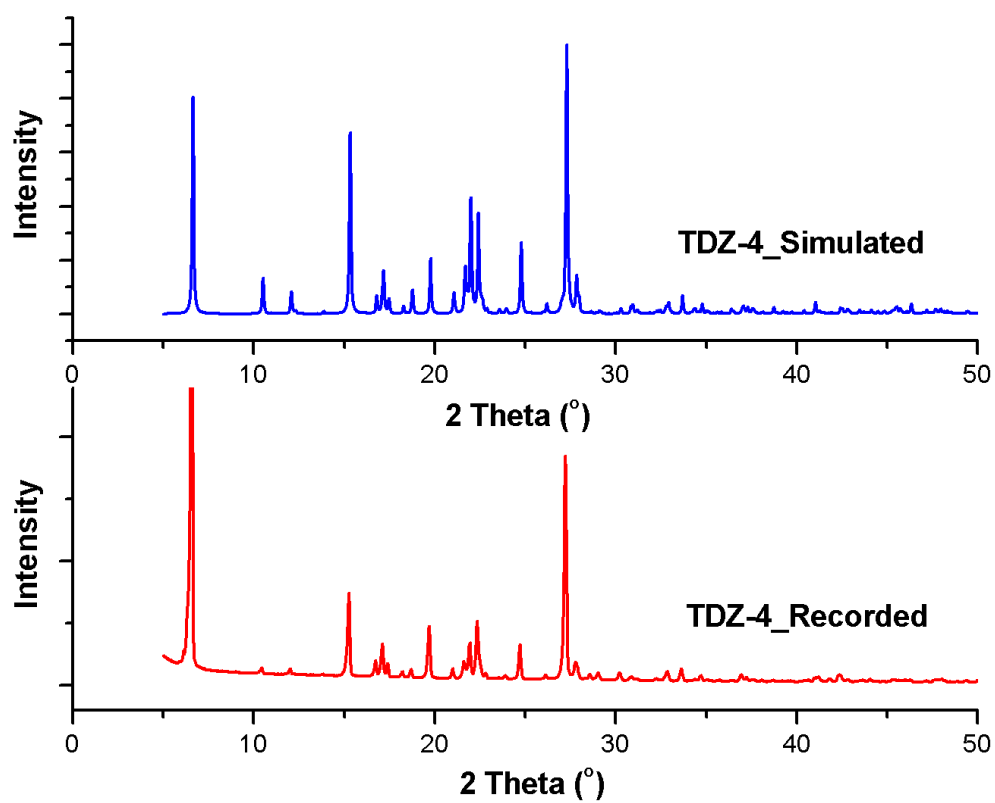

Powder profile based on prf file TDZ-4

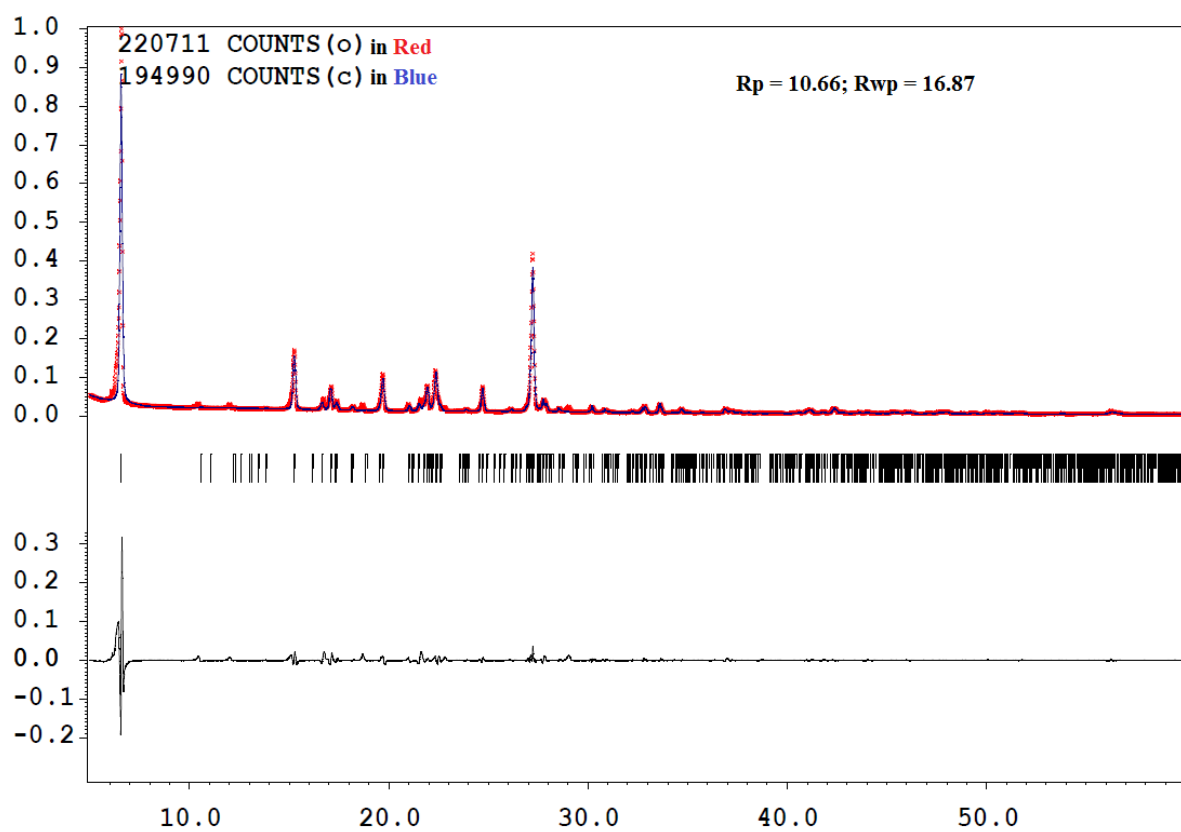

## Section 2: Hirshfield surfaces from Crystal Explorer 3.0

**Figure S5:** Hirshfield surfaces of four molecules mapped with different properties. Left column (front view) while right column (back view)

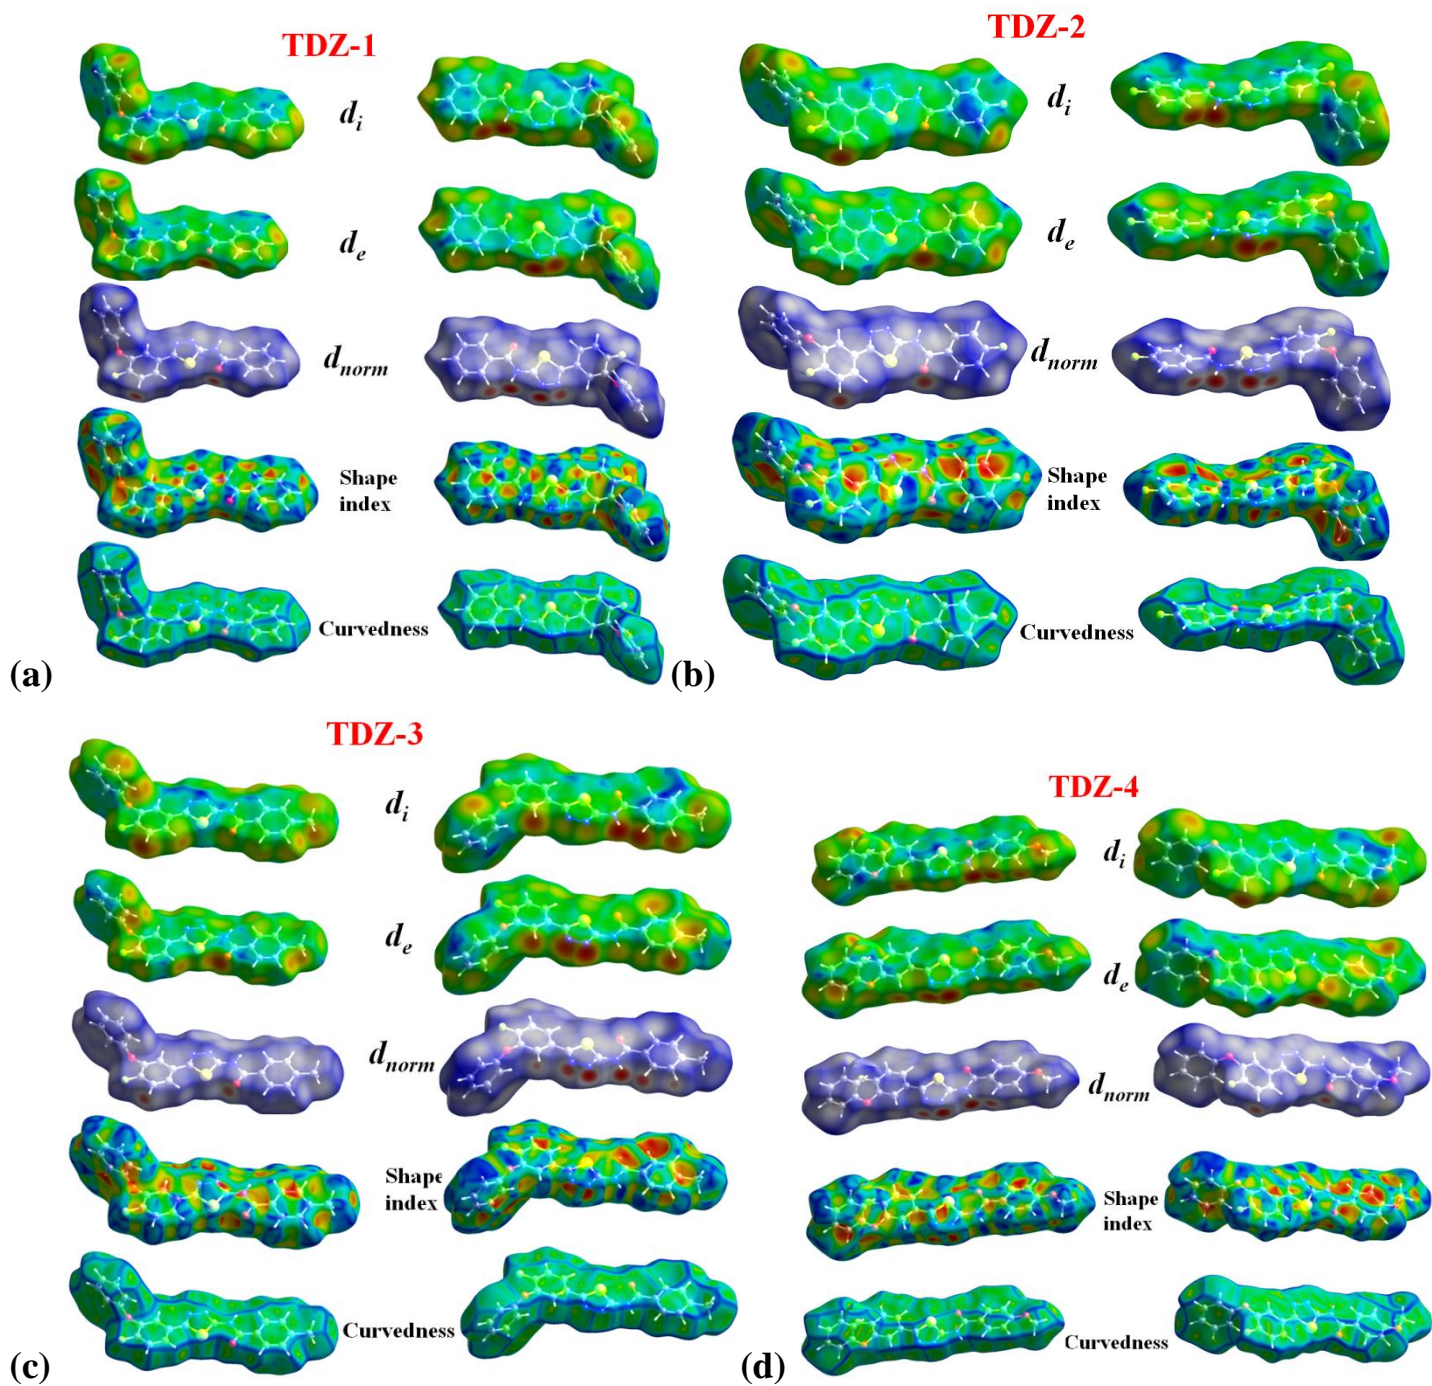

### Section 3:

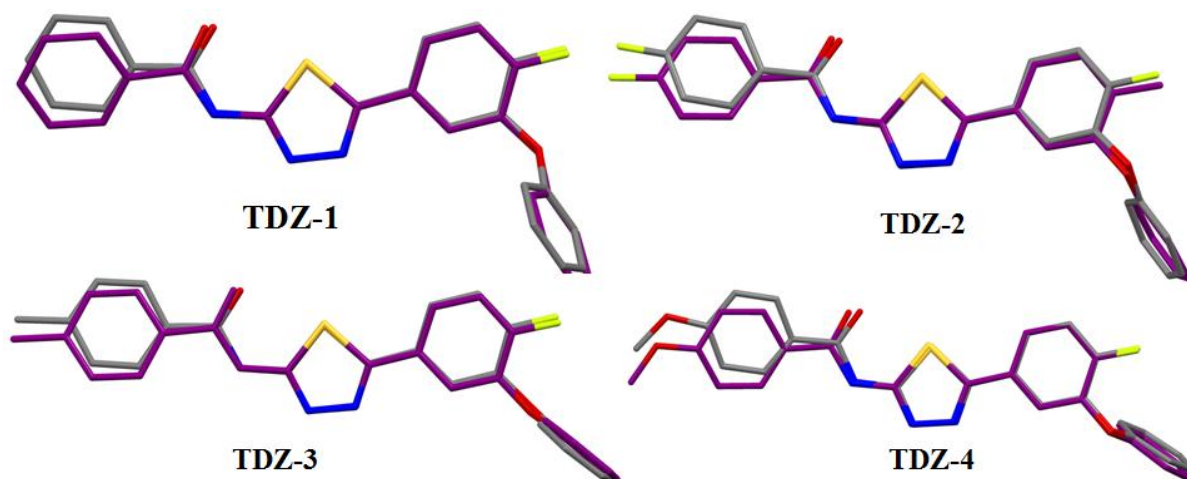

**Figure S6:** Molecular overlay diagram of all structures with the respective optimized geometry. Gray carbon corresponds to the solid state geometry and that of purple carbon corresponds to the gaseous state.

### Section 4: XPAC analysis:

For XPAC analysis the circled atoms, labeled with C3, C4, C5, C7-C17, C21, N1-N3, S1, O1, O2, F1, were consider for 'corresponding ordered sets of points' (COSPs) [Fig S6]. The filter setting a/p/d: 10/14/1.50 was applied for all comparisons.

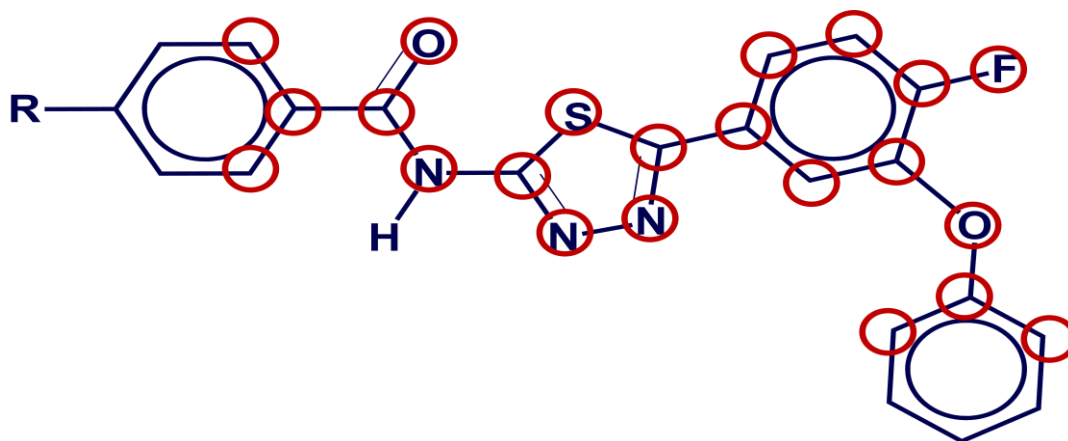

**Figure S7:** Selection of atoms for COSP denoted with red circles in all structures.



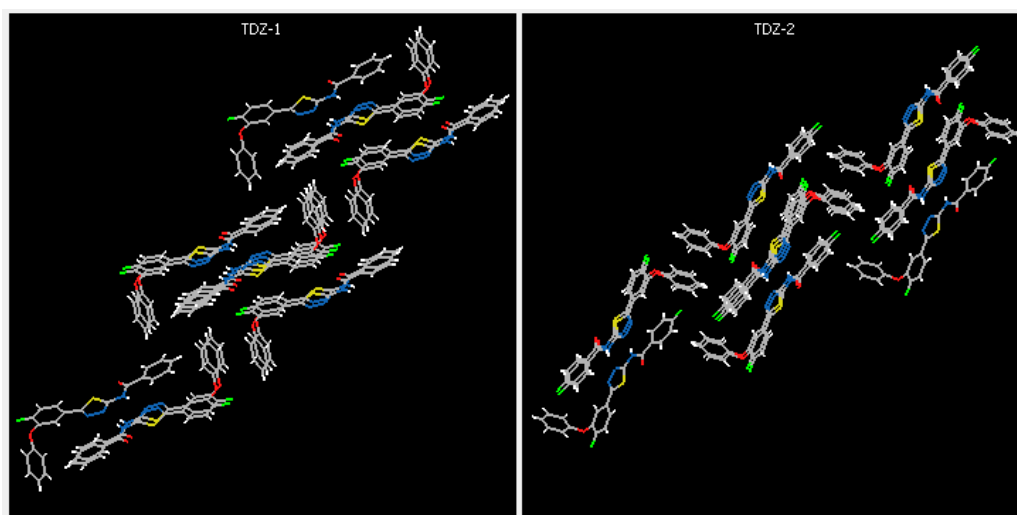

**Figure S8(a):** Comparison of crystal packing between TDZ-1 and TDZ-2 by XPAC depicting 3D SC.

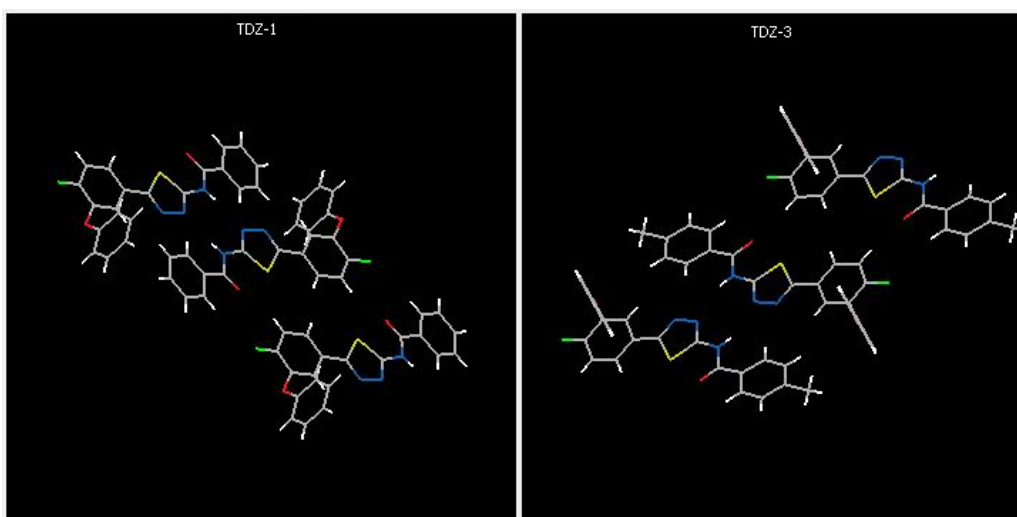

**Figure S8(b):** Comparison of crystal packing between TDZ-1 and TDZ-3 by XPAC depicting 1D SC.

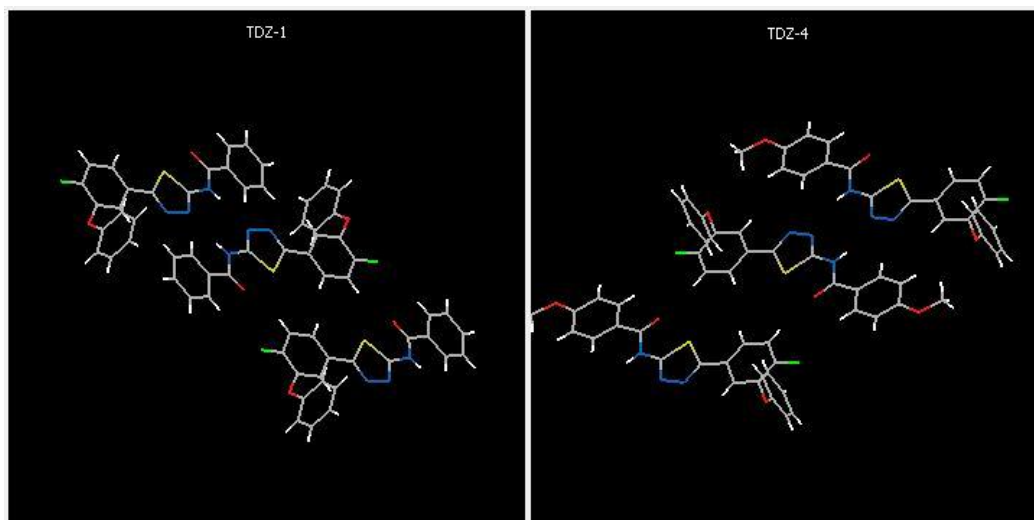

**Figure S8(c):** Comparison of crystal packing between TDZ-1 and TDZ-4 by XPAC depicting 1D SC.

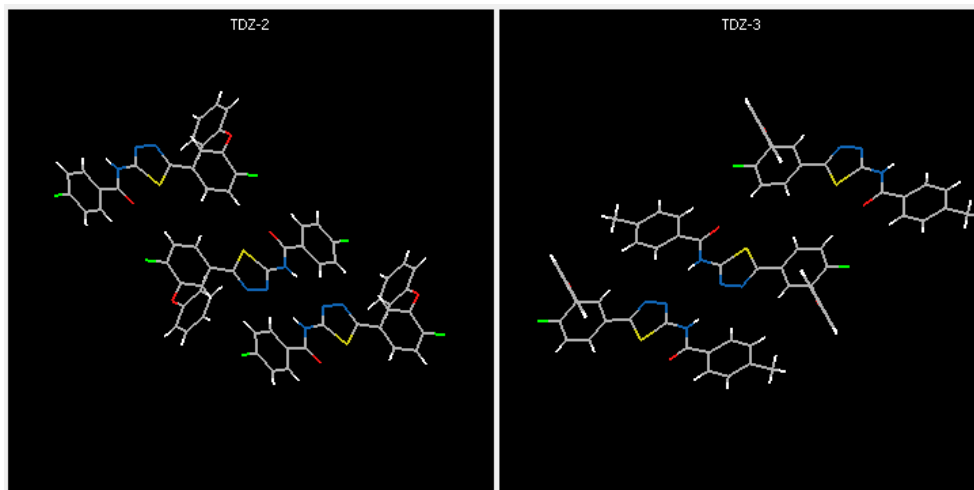

**Figure S8(d):** Comparison of crystal packing between TDZ-2 and TDZ-3 by XPAC depicting 1D SC.

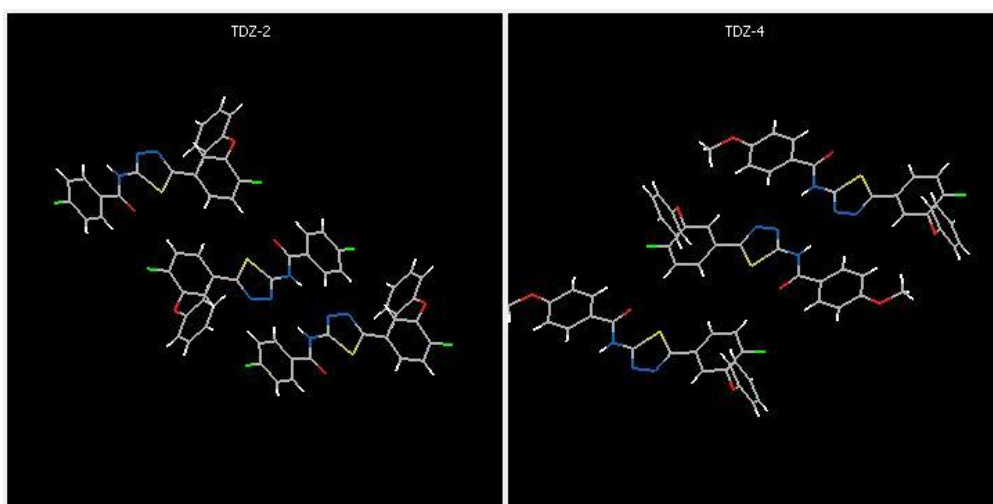

**Figure S8(e):** Comparison of crystal packing between TDZ-2 and TDZ-4 by XPAC depicting 1D SC.

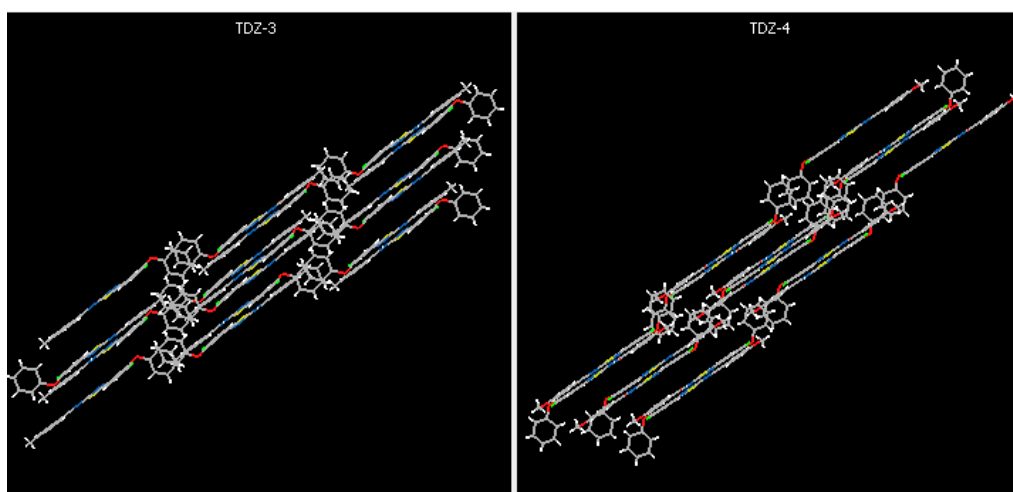

**Figure S8(f):** Comparison of crystal packing between TDZ-3 and TDZ-4 by XPAC depicting 3D SC.

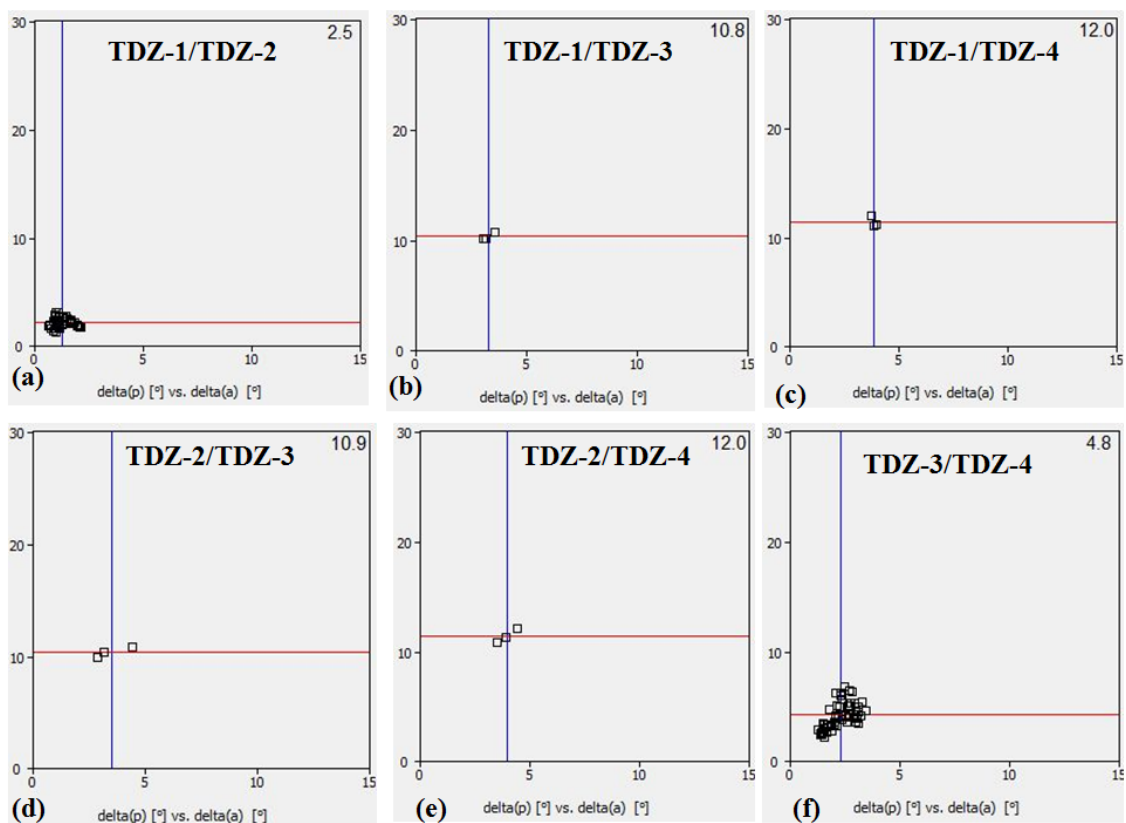

**Figure S9:** XPAC plots  $\delta\rho$  [y-axis] against  $\delta a$  [x-axis] (both in  $^\circ$ ), displaying the degree of similarity. Upper right corner is the dissimilarity index X, vertical and horizontal lines are the mean values of  $\delta a$  and  $\delta\rho$ , respectively.

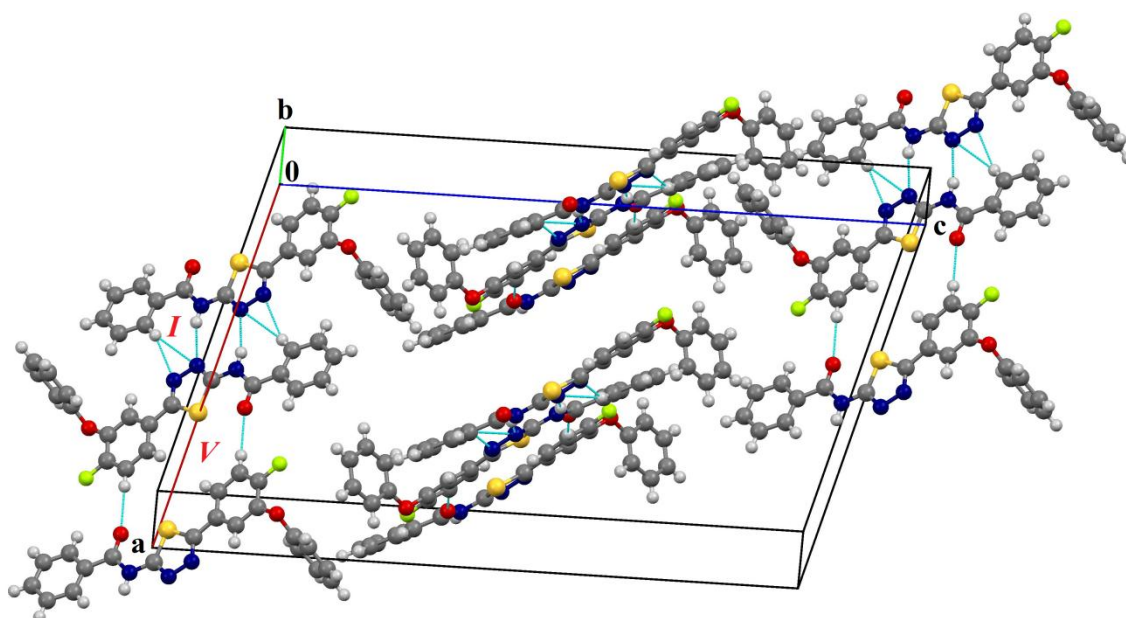

**Figure S10(a):** Packing of molecules *via* strong  $\text{N-H}\cdots\text{N}_{\text{aromatic}}$ , weak  $\text{C-H}\cdots\text{N}_{\text{aromatic}}$  and  $\text{C-H}\cdots\text{O}=\text{C}$  hydrogen bonds in TDZ-1.

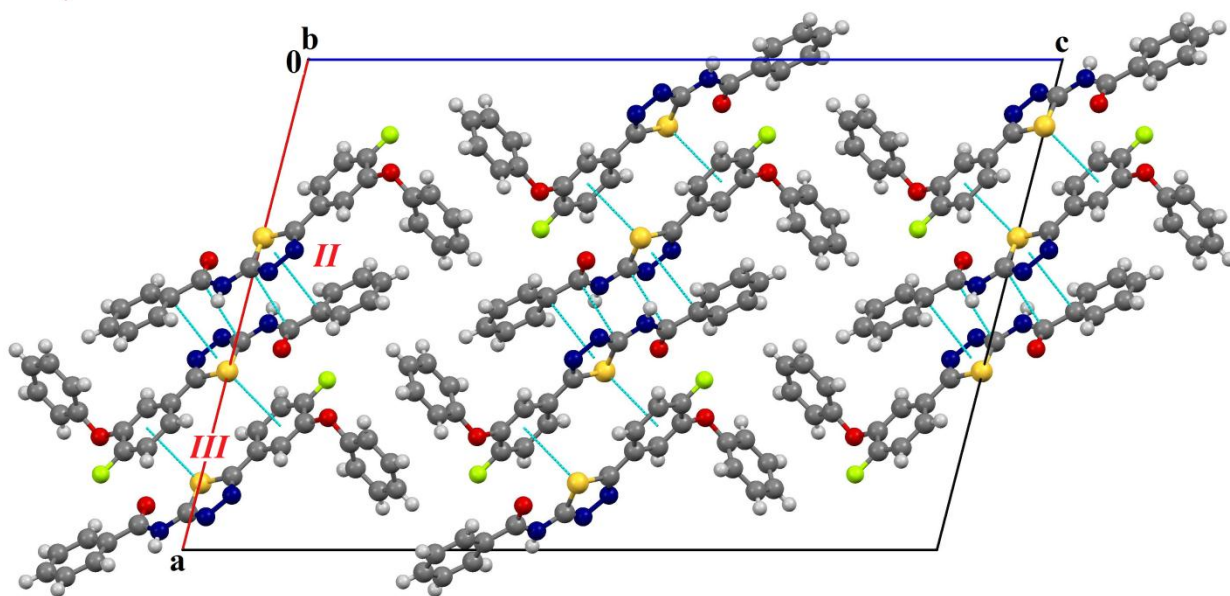

**Figure S10(b):** Packing view down the ac plane in TDZ-1, displays weak  $\pi \cdots \pi$  and  $S(lp) \cdots \pi$  interactions.

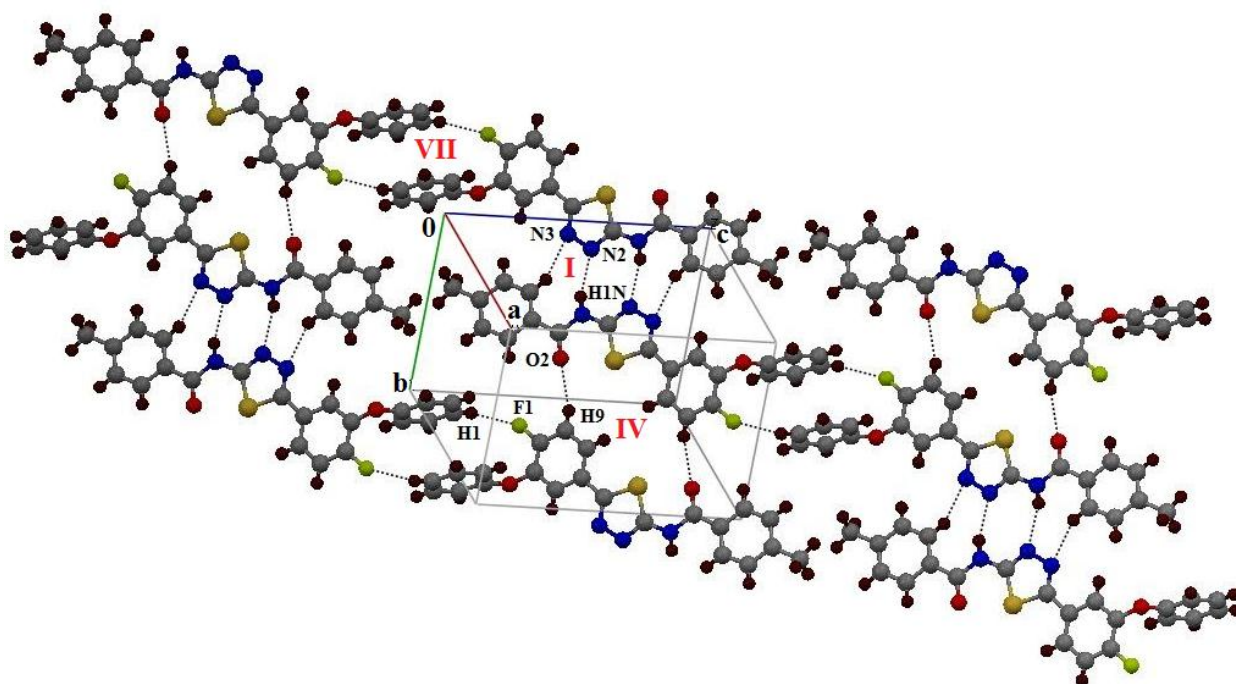

**Figure S11:** Packing of molecules in TDZ-3 via strong  $N-H \cdots N_{aromatic}$ , weak  $C-H \cdots N_{aromatic}$ ,  $C-H \cdots O=C$  and  $C-H \cdots F$  hydrogen bonds.

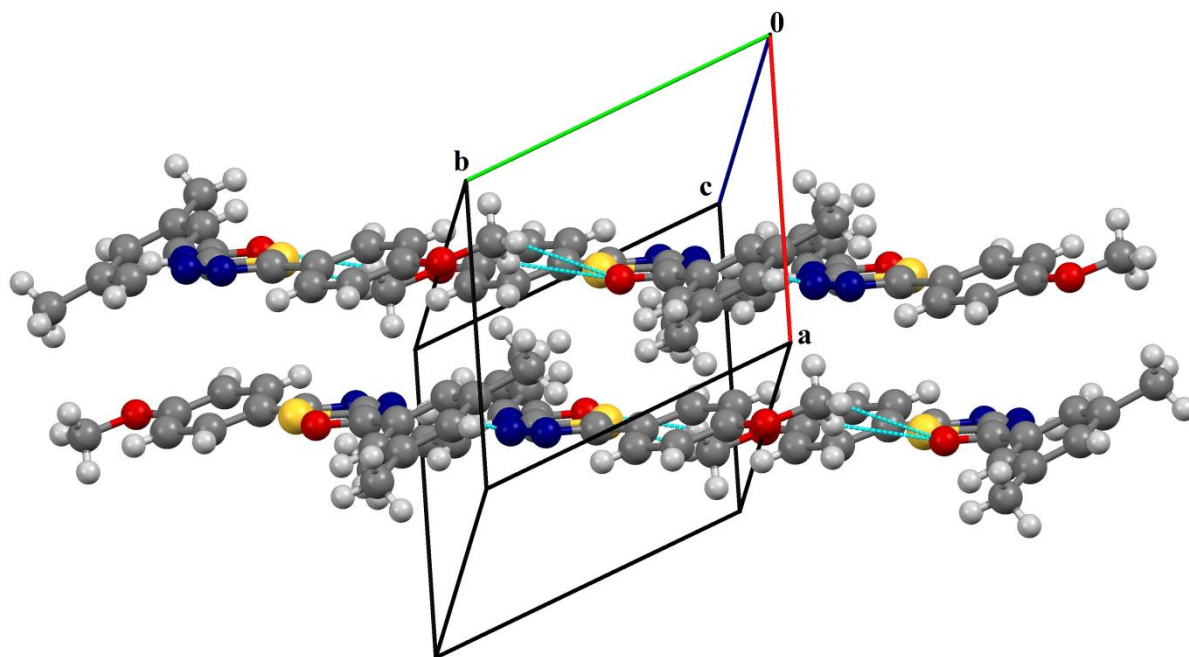

**Figure S12 (a):** Packing diagram of NEQPAB depicting N-H...N<sub>aromatic</sub> and C-H...O=C H-bonds.

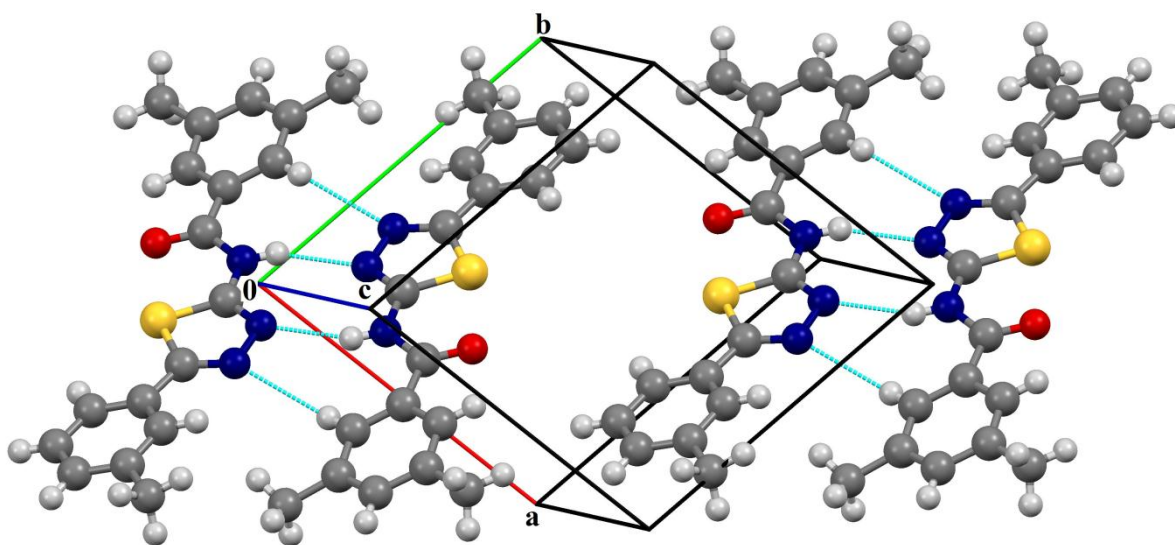

**Figure S12 (b):** Packing diagram of REWBUR depicting N-H...N<sub>aromatic</sub> and C-H...N<sub>aromatic</sub> H-bonds.

## Section 5: Results from Theoretical Calculations performed using TURBOMOLE:

| Molecular motifs                       | Interaction Energy calculated by DFT+Disp/B97-D/cc-pVTZ (kcal/mol) | Counter Poise corrected Interaction Energy (kcal/mol) | BSSE (kcal/mol) |
|----------------------------------------|--------------------------------------------------------------------|-------------------------------------------------------|-----------------|
| <b>TDZ-1</b>                           |                                                                    |                                                       |                 |
| <b>I</b>                               | -27.22                                                             | -25.24                                                | 1.98            |
| <b>II</b>                              | -17.28                                                             | -15.63                                                | 1.65            |
| <b>III</b>                             | -16.45                                                             | -13.94                                                | 2.51            |
| <b>IV</b>                              | -10.6                                                              | -8.96                                                 | 1.64            |
| <b>V</b>                               | -7.45                                                              | -6.10                                                 | 1.35            |
| <b>Common SC(Fig 8 in Manuscript)</b>  | -34.8                                                              | -31.4                                                 | 3.40            |
| <b>TDZ-2</b>                           |                                                                    |                                                       |                 |
| <b>I</b>                               | -27.69                                                             | -25.09                                                | 2.60            |
| <b>II</b>                              | -23.54                                                             | -15.96                                                | 7.58            |
| <b>III</b>                             | -17.14                                                             | -14.54                                                | 2.60            |
| <b>IV</b>                              | -10.43                                                             | -8.73                                                 | 1.70            |
| <b>V</b>                               | -7.92                                                              | -6.53                                                 | 1.39            |
| <b>Common SC (Fig 8 in Manuscript)</b> | -35.7                                                              | -31.7                                                 | 4.00            |
| <b>TDZ-3</b>                           |                                                                    |                                                       |                 |
| <b>I</b>                               | -23.98                                                             | -21.95                                                | 2.03            |
| <b>II</b>                              | -19.07                                                             | -16.70                                                | 2.37            |
| <b>III</b>                             | -17.22                                                             | -15.57                                                | 1.65            |
| <b>IV</b>                              | -7.49                                                              | -6.28                                                 | 1.21            |
| <b>V</b>                               | -8.16                                                              | -6.88                                                 | 1.28            |
| <b>VI</b>                              | -6.43                                                              | -5.76                                                 | 0.67            |
| <b>VII</b>                             | -5.79                                                              | -4.30                                                 | 1.49            |
| <b>Common SC (Fig 8 in Manuscript)</b> | -31.5                                                              | -28.3                                                 | 3.20            |
| <b>TDZ-4</b>                           |                                                                    |                                                       |                 |
| <b>I</b>                               | -27.19                                                             | -24.96                                                | 2.23            |
| <b>II</b>                              | -20.32                                                             | -17.73                                                | 2.59            |
| <b>III</b>                             | -19.67                                                             | -17.31                                                | 2.36            |
| <b>IV</b>                              | -7.94                                                              | -6.67                                                 | 1.27            |
| <b>V</b>                               | -8.71                                                              | -7.40                                                 | 1.31            |
| <b>VI</b>                              | -7.51                                                              | -6.74                                                 | 0.77            |
| <b>VII</b>                             | -6.32                                                              | -4.86                                                 | 1.46            |
| <b>Common SC(Fig 8 in Manuscript)</b>  | -35.2                                                              | -31.7                                                 | 3.50            |
